# Incoherent collective cell chemotaxis in a zebrafish model of branchio-oto-renal syndrome

**Jerónimo R. Miranda-Rodríguez<sup>1</sup>, Augusto Borges<sup>2,2</sup>, Filipe Pinto-Teixeira<sup>3</sup>, Indra Wibowo<sup>4</sup>,  
Hans-Martin Pogoda<sup>5</sup>, Matthias Hammerschmidt<sup>5</sup>, Koichi Kawakami<sup>6</sup> and Hernán López-  
Schier<sup>1\*</sup>**

1. Unit of Sensory Biology & Organogenesis, Helmholtz Zentrum Munich, Germany
  2. Graduate School of Quantitative Biosciences (QBM), Munich, Germany
  3. Center for Developmental Biology, Université Paul Sabatier, Toulouse, France
  4. School of Technology and Life Sciences, Bandung, Indonesia
  5. Institute for Developmental Biology, University of Cologne, Cologne, Germany
  6. Laboratory of Molecular and Developmental Biology, National Institute of Genetics SOKENDAI, 1111 Yata Mishima, Shizuoka 411-8540, Japan
- \* Corresponding author: [hernan.lopez-schier@helmholtz-muenchen.de](mailto:hernan.lopez-schier@helmholtz-muenchen.de)

## ABSTRACT

Mutations in the transcriptional co-activator *Eya1* cause branchio-oto-renal syndrome (BOR) in humans. BOR has an incidence of 1/40,000 and is characterized by congenital branchial fistulas, malformations of the inner ear and kidney hypoplasia. Therapeutic interventions for BOR are currently limited to reparative surgery, hearing aids and dialysis. Here we use the mechanosensory lateral line in zebrafish to better understand the role of *Eya1* in organogenesis. The lateral line develops from a primordium formed by approximately 150 cells that move together from head to tail of the embryo at a constant velocity. This invariant migration occurs over a trail of *Sdf1a* chemokine and is controlled by the simultaneous action of two receptors. The *CXCR4b* is expressed in the front half of the primordium where it acts as a chemokine sensor, whereas the *CXCR7b* is present in the rear half, serving as a chemokine sink to ensure persistent directionality. We show that the loss of *Eya1* strongly reduces the expression of *CXCR7b*, disrupting the coherent motion of the primordium and leading to lateral-line truncations. We also find evidence of reduced FGF signaling and epithelial maturation in primordia lacking *Eya1*. These findings argue for abnormal collective cell chemotaxis as the origin of organ dysmorphism in BOR.

## INTRODUCTION

The coordinated action of multiple cells governs the development of tissue shape and pattern. For example, collective cell migration influences the formation of various organs, including the eye, kidney, skin follicles, inner ear and lateral line (Scarpa and Mayor, 2016; Dalle Nogare and Chitnis, 2017; Gunawan et al., 2019; La Porta and Zapperi, 2019). The movement of cellular collectives is regulated by a network of cellular communication molecules that include attractive signals, for instance chemokines, and their receptors. One example of collective cell migration that has been extensively studied occurs during the formation of the posterior lateral line in zebrafish (López-Schier, 2010). The lateral line develops from a group of around 150 cells that form a primordium in the embryo (Ghysen and Dambly-Chaudière, 2007). These cells migrate together along the anteroposterior axis of the animal over the course of around 24 hours. As the primordium moves, it deposits clusters of 20–30 cells at semi-regular intervals, which eventually arrest movement and develop into discrete organs called neuromasts. The coherent migration of the primordium - direction, orientation and persistence - is mediated by the complementary expression pattern of the CXCR4b and CXCR7b chemokine receptors (Valentin et al., 2007; Lau et al., 2020). Leading primordial cells express CXCR4b whereas trailing cells express CXCR7b. Both receptors detect the chemokine Sdf1a/CXCL12 that is expressed as a straight line from head to tail along the horizontal myoseptum of the embryo (Donà et al., 2013; Venkiteswaran et al., 2013). The expression of CXCR4b and CXCR7b and epitheliogenesis are under control of intercellular signals acting on non-overlapping parts of the cellular collective. The leading region of the primordium activates Wnt/beta-catenin, whereas FGF signaling is active at the trailing region (Lecaudey et al., 2008; Nechiporuk and Raible, 2008; Aman et al., 2011; Agarwala et al., 2015). Moreover, elegant experiments have revealed that the coherent migration of the primordium requires a combined function of E- and N-cadherins (Colak-Champollion et al., 2019).

Mutations in genes driving collective cell behavior have profound deleterious effects on organogenesis. One gene of particular interest that is co-expressed with CXCR4b and CXCR7b in the lateral-line primordium is *Eya1*, which when mutated disrupts the distribution of neuromasts (Kozlowski et al., 2005; Sahly et al., 1999; Seleit et al., 2017; Almasoudi and Schlosser, 2021). *Eya1* is a protein tyrosine phosphatase with transcriptional activity when associated with the DNA-binding protein *Six1*. Their function is conserved across species (Shah et al., 2020). For instance, mice lacking *Eya1* or *Six1* have malformed kidneys and ears (Wong et al., 2013; Xu et al., 1999; Xu et al., 2003; Xu, 2013). In humans, mutations in *Eya1* segregate with 40% of cases of Branchio-Oto-Renal syndrome (BOR) (Abdelhak et al., 1997; Sánchez-Valle et al., 2010; Krug et al., 2011). BOR is a

heterogeneous condition causing various degrees of renal dysfunction and conductive hearing loss. It is characterized by congenital branchial fistulas, malformations of the inner ear and kidney hypoplasia (Kochhar et al., 2007; Feng et al., 2021; Chen et al., 1995). Standard treatments for BOR over the past 25 years have been kidney transplants, dialysis and hearing aids (Smith, 1993; Tian et al., 2022). More innovative interventions are lacking in part because the cellular mechanisms that are disrupted in BOR remain obscure (Soni et al., 2021). Here we combine forward- and reverse-genetic analyses with live imaging to study a model of BOR in zebrafish. Our results shed new light on the role of *Eya1* on collective cell migration, and suggest potential avenues to explore novel therapeutic strategies for human patients.

## RESULTS

### Loss of *Eya1* disrupts the pattern of neuromast deposition

Alterations of the *Sdf1a* chemokine or its receptors *CXCR4b* and *CXCR7b* lead to defects in neuromast deposition. Therefore, we speculated that genetic mutations affecting the number of neuromasts will identify factors involved in chemokine signaling. Following this rationale, we analyzed zebrafish carrying a loss-of-function mutation in *Eya1*, which has previously been reported to reduce the number of posterior neuromasts (Fig. 1A-B,E-F) (Kozłowski et al., 2005; Nica et al., 2006). Using somatic CRISPR/Cas9-mediated genome engineering we mutated *Eya1* and confirmed that its loss generates an average of 5 neuromasts instead of the 8 organs normally found in wild-type fish at 3 days-post-fertilization (dpf) (Fig. 1C,F). We found a qualitatively similar phenotype in specimens injected with a translation-blocking morpholino against *Eya1* (Fig. 1D). To assess the phenotype in more detail, we used two fluorescent enhancer-trap lines: *SqET20* to mark supporting cells and *SqET4* to highlight mechanosensory hair cells (Parinov et al., 2004). We found that neuromast survival over the course of 4 days after deposition was not affected by the loss of *Eya1* (Fig. 1G-J). However, mutant neuromasts had noticeably fewer hair cells (Fig. 1H,J). These data indicate that the lateral-line defects in *Eya1* mutants must arise during development and not from postembryonic degeneration of neuromasts. Therefore, we focused attention on the initial formation of the lateral line. When looking at early embryos, we found that loss of *Eya1* delayed the migration of primordium (Fig. 2A-E). Some previous work has shown that defective mitotic activity of primordial cells decreases the rate of migration and neuromast deposition (Aman et al., 2011; Gamba et al., 2010; Valdivia et al., 2011; McGraw et al., 2011). However, others have concluded that mitotic activity has negligible effects on migration (Matsuda et al., 2013). Therefore, we assessed cellular proliferation by performing BrdU incorporation in wild-type *Eya1(-)* embryos. This experiment showed that primordial cells actively divided in both samples (Fig. F-I). Also,

because loss of *Eya1* decreases cellular viability in several organ primordia, we assessed apoptosis in wild-type and *Eya1*-mutant lateral-line primordia by the TUNEL assay. We found that whereas most primordial cells in wild-type animals remained viable during migration (Fig. 2J-L), *Eya1* mutants experienced significant apoptosis throughout the entire primordium (Fig. M-O). Together, these results show that *Eya1* is essential for the initial development of the posterior lateral line.

### ***Eya1* is necessary for the migratory coherence**

Next, we decided to focus on primordial-cell dynamics from the onset of migration by *in toto* videomicroscopy, combining two fluorescent enhancer-trap lines from the Kawakami collection (Kawakami et al., 2004). We first characterized a new line called Tg[gSAG181A], which is unique in that it is the first that expresses EGFP exclusively in the posterior lateral-line primordium (Fig. 3A). Tg[gSAG181A] is an insertion near the SAM and SH3 domain containing 1a (*sash1a*) locus on chromosome 20. The Tg[SAGFF(LF)19A] is an insertion of a Gal4 transgene into *Ebf3* locus (Kuriki et al., 2020). When combined with a UAS-driven RFP, we observed that it is expressed in the rear part of the primordium and in neuromasts (Fig. 3B). When combined, Tg[gSAG181A;SAGFF(LF)19A;UAS:RFP] allows a specific labeling of the posterior lateral-line primordium for high-quality live imaging and kymography (Fig. 3C-F and Supp. Movies 1 and 2). At a recording temperature of 28°C, we saw that wild-type primordia move at a constant velocity of around 80 µm/hour (Fig. 3C,E), depositing SAGFF(LF)19A-rich neuromasts, whereas *Eya1*-deficient primordia undergo cycles of migration and stalling, averaging a markedly reduced speed of 14 µm/hour (Fig. 3D,F). The loss of *Eya1* strongly reduced the expression of SAGFF(LF)19A (Fig. 3D,F). Incidentally, live imaging of mutant fish shows apoptosis during migration (Supp. Movie 2), supporting our previous result using TUNEL staining (Fig. 2G-G'). Moreover, we found some instances in which the posterior primordium lacking *Eya1* loses directionality when it makes u-turns to move back towards the head (Fig. 3F and Supp. Movie 2). Therefore, the loss of *Eya1* does not block primordium migration, but instead creates pronounced defects in its otherwise coherent motion.

### ***Eya1* is necessary for CXCR7b expression**

Using the Tg[Cldnb:lynEGFP] transgenic line to individualize cells, we also found many instance in which the primordium splits transiently during migration (Fig. 3G). Interestingly, both phenotypes have been observed in fish lacking CXCR7b (Valentin et al., 2007). Therefore, we decided to analyze the signaling pathway that governs the collective chemotaxis of primordial cells: the CXCR4b and CXCR7b chemokine receptors and the *Sdf1a* chemokine. We hypothesized that loss of *Eya1* does

not affect *Sdf1a* because migration in the mutants occurred along the horizontal myoseptum, which is the normal path of the primordium. Indeed, the expression of *Sdf1a* was normal in *Eya1*-mutant fish (Fig. 4A-B). By contrast, we saw that while *CXCR4b* remained expressed in the leading zone in *Eya1* mutant primordia (Fig. 4C-C'), the expression of *CXCR7b* was strongly reduced (Fig. 4D-D'). We conclude that the function of *Eya1* is intrinsic to the primordium and that its loss causes incoherent primordium migration due to strongly reduced *CXCR7b* expression.

### **Loss of *Eya1* affects FGF signaling and delays epitheliogenesis**

Our previous results show that *Eya1* controls the expression of a subset of genes expressed in the primordium. To further explore this, we profiled gene expression by whole-mount *in situ* hybridization. We first looked at the Notch pathway because it reveals the rate of cellular differentiation in the primordium (Matsuda et al., 2013). We found that the expression of the *Notch3a* receptor and the *DeltaA* ligand were not affected in *Eya1* mutants (Fig. 5A-H). Next, we focused on FGF signaling pathway for two reasons: 1) its activity domain overlaps that of *CXCR7b* and 2) blocking FGF results in migratory defects (Nechiporuk and Raible, 2008; Lecaudey et al., 2008). In fish lacking *Eya1*, the expression of *Pea3*, a *bona fide* target of FGF signaling, was almost completely abolished (Fig. 5I-J). *Eya1* loss also reduced the expression of *Fgfr1a*, which is normally maintained by a positive feedback loop in the FGF signaling cascade (Fig. 5K-L'), but slightly expanded the expression domain of the *Fgf3* ligand (Fig. 5K-L''). Thus, in the absence of *Eya1* the primordium experiences simultaneous reduction of FGF signaling and *CXCR7b* expression. This combination of phenotypes has already been reported for zebrafish embryos treated with the FGFR inhibitor SU5402, suggesting that loss of *Eya1* reduces *CXCR7b* expression by impairing FGF signaling (Aman et al., 2011). To test this possibility, we artificially forced FGF signaling in *Eya1* mutants. To this end, we abrogated *Eya1* using a translation-blocking morpholino and activated FGF using the transgenic line Tg[hsp:CA-FGFR1] that expresses a constitutively active form of the FGFR1 upon heat-shock (Lee et al., 2009). As expected, knockdown of *Eya1* nearly completely eliminates *CXCR7b* expression (Fig. 5M-N). However, constitutive FGF signaling did not expand the expression of *CXCR7b* in wild-type fish (Fig. 5O), nor did it rescue *CXCR7b* expression in animals lacking *Eya1* (Fig. 5P). These results indicate that *Eya1* induces *CXCR7b* expression independently or downstream of the FGF receptor. Finally, it has been amply documented that FGF signaling governs epitheliogenesis during the maturation of neuromast in the primordium (Nechiporuk and Raible, 2008; Agarwala et al., 2015; Lecaudey et al., 2008; Kozlovskaja-Gumbriené et al., 2017; Durdu et al., 2014; Harding et al., 2014; Neelathi et al., 2018). Also, that the epithelial and neuronal cadherins are necessary for the formation of epithelial rosettes that prefigure neuromasts (Revenu et al., 2014).

Therefore, we assessed epitheliogenesis by staining wild-type and *Eya1*-mutant specimens with an antibody to N-cadherin, which highlights the constricted apices of the epithelial cells that form the rosettes. This experiment showed that although epithelialization does occur in the mutants, rosette formation is strongly defective (Fig. 5Q-T). Because neuromasts eventually do form (Fig. 1G-J), we conclude that loss of *Eya1* delays epithelial maturation.

## DISCUSSION

The zebrafish has emerged as a powerful model to understand the fundamentals of human disease (Santoriello and Zon, 2012). Here we show that the activity of the *Eya1* is essential for the coherent migration of the posterior lateral-line primordium. Quantitative live imaging revealed that *Eya1*-mutant primordia do not maintain migratory persistence and often undergo fragmentation and directional reversion of movement. Interestingly, this combination of defects has been seen in zebrafish devoid of the chemokine receptor *CXCR7b*, but not in those lacking *CXCR4b* or the chemokine *Sdf1a* (Valentin et al., 2007). Therefore, we reasoned that the *Eya1*-mutant phenotype derives from defects in *CXCR7b*. We confirm this prediction by showing that primordia lacking *Eya1* failed to express *CXCR7b*. In addition, loss of *Eya1* reduced epithelial maturation. This phenotype has been seen upon pharmacological or genetic inhibition of FGF signaling (Nechiporuk and Raible, 2008; Agarwala et al., 2015; Lecaudey et al., 2008). Indeed, we found evidence of reduced FGF signaling in the primordium of fish lacking *Eya1*. This conclusion is supported by recent findings showing that FGF signaling controls the expression of *CXCR7b* in the primordium (Dries et al., 2021). However, our experiments suggest that the effect of *Eya1* and FGF signaling upon *CXCR7b* may be independent or, alternatively, that *Eya1* mediates FGF-dependent *CXCR7b* expression downstream of the activated receptor. Further dissection of how *Eya1* controls the chemokine cascade in the zebrafish lateral line will yield novel insights on the fundamental mechanisms that underlie coherent multicellular behavior.

Importantly, our work has clinical significance. Genetic polymorphisms in *Eya1* segregate with 40% of BOR cases in humans (Krug et al., 2011; Kochhar et al., 2007; Sánchez-Valle et al., 2010). Yet, the cellular processes affected by mutations in *Eya1* and its effectors remain undefined. Collective cell migration underlies morphogenesis of the inner ear and the kidney, the two main organs affected in BOR patients (Vasilyev et al., 2009; Schumacher, 2019; Ishii et al., 2021; Renaud et al., 2022). Based on our findings, we propose that *Eya1* governs coherent collective cell movement during otic and renal development mainly via chemokine signaling. However, it is important to note that BOR patients express a wide spectrum of defects, which may be explained by *Eya1* controlling multiple

processes in parallel, either directly or indirectly, via various molecular pathways. This hypothesis is supported by genome-wide studies in humans, which have identified *Fgf3* as a contributor to BOR. It is noteworthy experiments *ex vivo*, which have implicated FGF signaling in ear organogenesis in birds and mammals. For example, depletion of *Fgf3* in placodal explants blocked the formation of otic vesicles, and homozygous *Fgf3* mutant mice develop severely malformed ears (Represa et al., 1991; Hatch et al., 2007). Thus, our data support the idea that phenotypic variation in *Eya1*-linked BOR results from coincident loss of FGF signaling and multicellular chemotaxis. Mutations in the obligate *Eya1*-partner *Six1* are also causative of BOR. Notably, *CXCR7b* is a presumptively direct target of *Six1* and *Eya1* in *Xenopus* cranial placodes, which include the inner ear and the lateral line (Riddiford and Schlosser, 2016). Given that the causative mutation for over 50% of BOR cases is not yet known, we predict that the lateral line of zebrafish will remain a powerful model to validate genomic polymorphisms from GWAS studies of BOR patients, and generate novel cellular and molecular insights with translational potential. On this regards, our findings raise the possibility that augmenting residual *CXCR7* activity may improve the outcome of *Eya1* mutations in humans (Jiang et al., 2021; Hughes and Nibbs, 2018). It also encourages the development of tissue engineering approaches to control collective cell migration aimed at clinical applications (Manivannan et al., 2012).

## ACKNOWLEDGEMENTS

We thank K. Poss, G. Weidinger, and T. Whitfield for the gift of zebrafish lines and DNA constructs. This work was funded by the Helmholtz Association to HL-S. JRM-R received funding from the European Union's Horizon 2020 research and innovation programme under the Marie Skłodowska-Curie grant agreement No. 840834.

## CONFLICT OF INTEREST STATEMENT

HL-S is scientific advisor and paid consultant for Sensorion (France). The company had no role in this study. No conflict of interests exists.

## REFERENCES

Abdelhak, S., Kalatzis, V., Heilig, R., Compain, S., Samson, D., Vincent, C., Weil, D., Cruaud, C., Sahly, I., Leibovici, M., et al. (1997). A human homologue of the *Drosophila* eyes absent gene underlies Branchio-Oto-Renal (BOR) syndrome and identifies a novel gene family. *Nat Genet* 15, 157–164.

- Agarwala, S., Duquesne, S., Liu, K., Boehm, Grimm, L., Link, S., König, Eimer, S., Ronneberger, O. and Lecaudey, V. (2015). Amotl2a interacts with the Hippo effector Yap1 and the Wnt/ $\beta$ -catenin effector Lef1 to control tissue size in zebrafish. *eLife* 4, e08201.
- Almasoudi, S. H. and Schlosser, G. (2021). Otic Neurogenesis in *Xenopus laevis*: Proliferation, Differentiation, and the Role of Eya1. *Front. Neuroanat.* 15, 722374.
- Aman, A., Nguyen, M. and Piotrowski, T. (2011). Wnt/ $\beta$ -catenin dependent cell proliferation underlies segmented lateral line morphogenesis. *Developmental Biology* 349, 470.
- Chen, A., Francis, M., Ni, L., Cremers, C. W. R. J., Kimberling, W. J., Sato, Y., Phelps, P. D., Bellman, S. C., Wagner, M. J., Pembrey, M., et al. (1995). Phenotypic manifestations of branchiootorenal syndrome. *Am. J. Med. Genet.* 58, 365–370.
- Colak-Champollion, T., Lan, L., Jadhav, A. R., Yamaguchi, N., Venkiteswaran, G., Patel, H., Cammer, M., Meier-Schellersheim, M. and Knaut, H. (2019). Cadherin-Mediated Cell Coupling Coordinates Chemokine Sensing across Collectively Migrating Cells. *Current Biology* 29, 2570-2579.e7.
- Dalle Nogare, D. and Chitnis, A. B. (2017). A framework for understanding morphogenesis and migration of the zebrafish posterior Lateral Line primordium. *Mechanisms of Development* 148, 69–78.
- Dalle Nogare, D. D., Nikaido, M., Somers, K., Head, J., Piotrowski, T. and Chitnis, A. B. (2017). In toto imaging of the migrating Zebrafish lateral line primordium at single cell resolution. *Developmental Biology* 422, 14–23.
- Donà, E., Barry, J. D., Valentin, G., Quirin, C., Khmelinskii, A., Kunze, A., Durdu, S., Newton, L. R., Fernandez-Minan, A., Huber, W., et al. (2013). Directional tissue migration through a self-generated chemokine gradient. *Nature* 503, 285–289.
- Dries, R., Lange, A., Heiny, S., Berghaus, K. I., Bastmeyer, M. and Bentrop, J. (2021). Cell Proliferation and Collective Cell Migration During Zebrafish Lateral Line System Development Are Regulated by Ncam/Fgf-Receptor Interactions. *Front. Cell Dev. Biol.* 8, 591011.
- Durdu, S., Iskar, M., Revenu, C., Schieber, N., Kunze, A., Bork, P., Schwab, Y. and Gilmour, D. (2014). Luminal signalling links cell communication to tissue architecture during organogenesis. *Nature* 515, 120–124.
- Feng, H., Xu, H., Chen, B., Sun, S., Zhai, R., Zeng, B., Tang, W. and Lu, W. (2021). Genetic and Phenotypic Variability in Chinese Patients With Branchio-Oto-Renal or Branchio-Oto Syndrome. *Front. Genet.* 12, 765433.
- Gamba, L., Cubedo, N., Lutfalla, G., Ghysen, A. and Dambly-Chaudiere, C. (2010). lef1 controls patterning and proliferation in the posterior lateral line system of zebrafish. *Dev. Dyn.* 239, 3163–3171.



- Ghysen, A. and Dambly-Chaudière, C. (2007). The lateral line microcosmos. *Genes Dev* 21, 2118–2130.
- Gunawan, F., Gentile, A., Fukuda, R., Tsedeke, A. T., Jiménez-Amilburu, V., Ramadass, R., Iida, A., Sehara-Fujisawa, A. and Stainier, D. Y. R. (2019). Focal adhesions are essential to drive zebrafish heart valve morphogenesis. *J. Cell Biol.* 218, 1039–1054.
- Haas, P. and Gilmour, D. (2006). Chemokine signaling mediates self-organizing tissue migration in the zebrafish lateral line. *Dev Cell* 10, 673–680.
- Harding, M. J., McGraw, H. F. and Nechiporuk, A. (2014). The roles and regulation of multicellular rosette structures during morphogenesis. *Development* 141, 2549.
- Hatch, E. P., Noyes, C. A., Wang, X., Wright, T. J. and Mansour, S. L. (2007). *Fgf3* is required for dorsal patterning and morphogenesis of the inner ear epithelium. *Development* 134, 3615–3625.
- Hughes, C. E. and Nibbs, R. J. B. (2018). A guide to chemokines and their receptors. *FEBS J* 285, 2944–2971.
- Ishii, M., Tateya, T., Matsuda, M. and Hirashima, T. (2021). Retrograde ERK activation waves drive base-to-apex multicellular flow in murine cochlear duct morphogenesis. *eLife* 10, e61092.
- Jiang, C., Li, R., Xiu, C., Ma, X., Hu, H., Wei, L., Tang, Y., Tao, M. and Zhao, J. (2021). Upregulating CXCR7 accelerates endothelial progenitor cell-mediated endothelial repair by activating Akt/Keap-1/Nrf2 signaling in diabetes mellitus. *Stem Cell Res Ther* 12, 264.
- Kawakami, K., Takeda, H., Kawakami, N., Kobayashi, M., Matsuda, N. and Mishina, M. (2004). A Transposon-Mediated Gene Trap Approach Identifies Developmentally Regulated Genes in Zebrafish. *Developmental Cell* 7, 133–144.
- Kochhar, A., Fischer, S. M., Kimberling, W. J. and Smith, R. J. H. (2007). Branchio-oto-renal syndrome. *Am. J. Med. Genet.* 143A, 1671–1678.
- Kozlovskaja-Gumbrienè, A., Yi, R., Alexander, R., Aman, A., Jiskra, R., Nagelberg, D., Knaut, H., McClain, M. and Piotrowski, T. (2017). Proliferation-independent regulation of organ size by Fgf/Notch signaling. *eLife* 6, e21049.
- Kozłowski, D. J., Whitfield, T. T., Hukriede, N. A., Lam, W. K. and Weinberg, E. S. (2005). The zebrafish *dog-eared* mutation disrupts *eya1*, a gene required for cell survival and differentiation in the inner ear and lateral line. *Developmental Biology* 277, 27–41.
- Krug, P., Morinière, V., Marlin, S., Koubi, V., Gabriel, H. D., Colin, E., Bonneau, D., Salomon, R., Antignac, C. and Heidet, L. (2011). Mutation screening of the EYA1, SIX1, and SIX5 genes in a large cohort of patients harboring branchio-oto-renal syndrome calls into question the pathogenic role of SIX5 mutations. *Hum. Mutat.* 32, 183–190.

- Kuriki, M., Sato, F., Arai, H. N., Sogabe, M., Kaneko, M., Kiyonari, Kawakami, K., Yoshimoto, Shukunami and Sehara-Fujisawa, A. (2020). Transient and lineage-restricted requirement of Ebf3 for sternum ossification. *Development* 147, dev186239.
- La Porta, C. A. M. L. and Zapperi, S. (2019). Statistical Features of Collective Cell Migration. In *Cell Migrations: Causes and Functions* (ed. La Porta and Zapperi), pp. 67–78.
- Lau, S., Feitzinger, A., Venkiteswaran, G., Wang, J., Lewellis, S. W., Koplinski, C. A., Peterson, F. C., Volkman, B. F., Meier-Schellersheim, M. and Knaut, H. (2020). A negative-feedback loop maintains optimal chemokine concentrations for directional cell migration. *Nat Cell Biol* 22, 266–273.
- Lecaudey, V., Cakan-Akdogan, G., Norton, W. H. J. and Gilmour, D. (2008). Dynamic Fgf signaling couples morphogenesis and migration in the zebrafish lateral line primordium. *Development* 135, 2695–2705.
- Lee, Y., Hami, D., De Val, S., Kagermeier-Schenk, B., Wills, A. A., Black, B. L., Weidinger, G. and Poss, K. D. (2009). Maintenance of blastemal proliferation by functionally diverse epidermis in regenerating zebrafish fins. *Developmental Biology* 331, 270–280.
- López-Schier, H. (2010). Fly fishing for collective cell migration. *Cur. Op. Gen. Dev.* 20, 4284.
- Manivannan, S., Gleghorn, J. P. and Nelson, C. M. (2012). Engineered Tissues to Quantify Collective Cell Migration During Morphogenesis. In *Kidney Development* (ed. Michos, O.), pp. 173–182. Totowa, NJ: Humana Press.
- Matsuda, M., Nogare, D. D., Somers, K., Martin, K., Wang, C. and Chitnis, A. B. (2013). Lef1 regulates Dusp6 to influence neuromast formation and spacing in the zebrafish posterior lateral line primordium. *Development* 140, 2387–2397.
- McGraw, H. F., Drerup, C. M., Culbertson, M. D., Linbo, T., Raible, D. W. and Nechiporuk, A. V. (2011). Lef1 is required for progenitor cell identity in the zebrafish lateral line primordium. *Development* 138, 3921–3930.
- Nechiporuk, A. and Raible, D. W. (2008). FGF-Dependent Mechanosensory Organ Patterning in Zebrafish. *Science* 320, 1774–1777.
- Neelathi, U. M., Dalle Nogare, D. and Chitnis, A. B. (2018). Cxcl12a induces *snail1b* expression to initiate collective migration and sequential Fgf-dependent neuromast formation in the zebrafish posterior Lateral Line primordium. *Development* dev.162453.
- Nica, G., Herzog, W., Sonntag, C., Nowak, M., Schwarz, H., Zapata, A. G. and Hammerschmidt, M. (2006). Eya1 is required for lineage-specific differentiation, but not for cell survival in the zebrafish adenohypophysis. *Dev. Biol.* 292, 189–204.
- Parinov, S., Kondrichin, I., Korzh, V. and Emelyanov, A. (2004). *Tol2* transposon-mediated enhancer trap to identify developmentally regulated zebrafish genes in vivo. *Dev. Dyn.* 231, 449–459.

- Pinto-Teixeira, F., Viader-Llargués, O., Torres-Mejía, E., Turan, M., González-Gualda, E., Pola-Morell, L. and López-Schier, H. (2015). Inexhaustible hair-cell regeneration in young and aged zebrafish. *Biol Open* 4, 903–909.
- Renauld, J. M., Khan, V. and Basch, M. L. (2022). Intermediate Cells of Dual Embryonic Origin Follow a Basal to Apical Gradient of Ingression Into the Lateral Wall of the Cochlea. *Front. Cell Dev. Biol.* 10, 867153.
- Represa, J., León, Y., Miner, C. and Giraldez, F. (1991). The int-2 proto-oncogene is responsible for induction of the inner ear. *Nature* 353, 561–563.
- Revenu, C., Streichan, S., Donà, E., Lecaudey, V., Hufnagel, L. and Gilmour, D. (2014). Quantitative cell polarity imaging defines leader-to-follower transitions during collective migration and the key role of microtubule-dependent adherens junction formation. *Development* 141, 1282–1291.
- Riddiford, N. and Schlosser, G. (2016). Dissecting the pre-placodal transcriptome to reveal presumptive direct targets of Six1 and Eya1 in cranial placodes. *eLife* 5, e17666.
- Sahly, I., Andermann, P. and Petit, C. (1999). The zebrafish *eya1* gene and its expression pattern during embryogenesis. *Development Genes and Evolution* 209, 399–410.
- Sanchez-Valle, A., Wang, X., Potocki, L., Xia, Z., Kang, S.-H. L., Carlin, M. E., Michel, D., Williams, P., Cabrera-Meza, G., Brundage, E. K., et al. (2010). HERV-mediated genomic rearrangement of EYA1 in an individual with branchio-oto-renal syndrome. *Am. J. Med. Genet.* 152A, 2854–2860.
- Santoriello, C. and Zon, L. I. (2012). Hooked! Modeling human disease in zebrafish. *J. Clin. Invest.* 122, 2337–2343.
- Scarpa, E. and Mayor, R. (2016). Collective cell migration in development. *Journal of Cell Biology* 212, 143–155.
- Schumacher, L. (2019). Collective Cell Migration in Development. In *Cell Migrations: Causes and Functions* (ed. La Porta, C. A. M.) and Zapperi, S.), pp. 105–116. Cham: Springer International Publishing.
- Seleit, A., Krämer, I., Ambrosio, E., Dross, N., Engel, U. and Centanin, L. (2017). Sequential organogenesis sets two parallel sensory lines in medaka. *Development* dev.142752.
- Shah, A. M., Krohn, P., Baxi, A. B., Tavares, A. L. P., Sullivan, C. H., Chillakuru, Y. R., Majumdar, H. D., Neilson, K. M. and Moody, S. A. (2020). Six1 proteins with human branchio-oto-renal mutations differentially affect cranial gene expression and otic development. *Disease Models & Mechanisms* dmm.043489.
- Smith, R. J. (1993). Branchiootorenal Spectrum Disorder. In *GeneReviews*<sup>®</sup> (ed. Adam, M. P.), Mirzaa, G. M.), Pagon, R. A.), Wallace, S. E.), Bean, L. J.), Gripp, K. W.), and Amemiya, A.), p. Seattle (WA): University of Washington, Seattle.

- Soni, U. K., Roychoudhury, K. and Hegde, R. S. (2021). The Eyes Absent proteins in development and in developmental disorders. *Biochem. Soc. Trans.* 49, 1397–1408.
- Tian, L., West, N. and Cayé-Thomasen, P. (2022). Cochlear implantation in Branchiootorenal syndrome – case report and review of the literature. *Coch. Imp. Internat.* 23, 52–57.
- Valdivia, L. E., Young, R. M., Hawkins, T. A., Stickney, H. L., Cavodeassi, F., Schwarz, Q., Pullin, L. M., Villegas, R., Moro, E., Argenton, F., et al. (2011). Lef1-dependent Wnt/ $\beta$ -catenin signalling drives the proliferative engine that maintains tissue homeostasis during lateral line development. *Development* 138, 3931–3941.
- Valentin, G., Haas, P. and Gilmour, D. (2007). The Chemokine SDF1a Coordinates Tissue Migration through the Spatially Restricted Activation of Cxcr7 and Cxcr4b. *Current Biology* 17, 1026–1031.
- Vasilyev, A., Liu, Y., Mudumana, S., Mangos, S., Lam, P.-Y., Majumdar, A., Zhao, J., Poon, K.-L., Kondrychyn, I., Korzh, V., et al. (2009). Collective Cell Migration Drives Morphogenesis of the Kidney Nephron. *PLoS Biol* 7, e1000009.
- Venkiteswaran, G., Lewellis, S. W., Wang, J., Reynolds, E., Nicholson, C. and Knaut, H. (2013). Generation and Dynamics of an Endogenous, Self-Generated Signaling Gradient across a Migrating Tissue. *Cell* 155, 674–687.
- Wong, E. Y. M., Ahmed, M. and Xu, P.-X. (2013). EYA1–SIX1 complex in neurosensory cell fate induction in the mammalian inner ear. *Hearing Research* 297, 13–19.
- Wu, RS., Lam II, Clay H, Duong DN, Deo RC, Coughlin SR. (2018). A Rapid Method for Directed Gene Knockout for Screening in G0 Zebrafish. *Dev. Cell* 46(1):112-125.e4.
- Xu, P.-X. (2013). The EYA-SO/SIX complex in development and disease. *Pediatr Nephrol* 28, 843–854.
- Xu, P.-X., Adams, J., Peters, H., Brown, M. C., Heaney, S. and Maas, R. (1999). Eya1-deficient mice lack ears and kidneys and show abnormal apoptosis of organ primordia. *Nat Genet* 23, 113–117.
- Xu, P.-X., Zheng, W., Huang, L., Maire, P., Laclef, C. and Silviu, D. (2003). *Six1* is required for the early organogenesis of mammalian kidney. *Development* 130, 3085–3094.

## **MATERIALS AND METHODS**

### **Zebrafish animals and strains**

Fish used were maintained under standardized conditions. Experiments were performed in accordance with protocols approved by the Ethical Committee of Animal Experimentation of the Helmholtz Zentrum München, the German Animal Welfare act Tierschutzgesetz §11, Abs. 1, Nr. 1, Haltungserlaubnis according to the European Union animal welfare, and under protocol number Gz.:55.2-1-54-2532-202-2014 and Gz.:55.2-2532.Vet\_02-17-187 from the "Regierung von

Oberbayern" (Germany). Eggs were collected from natural spawning and maintained at 28.5°C. Embryos were staged by hours post fertilization (hpf). The Eya mutant allele used in this study is *dog<sup>tmgo</sup>* (Nica et al., 2006). Embryos were genotyped according to Kozlowski et al. (Kozlowski et al., 2005). Transgenic lines used were *sqgw57Aet* (Pinto-Teixeira et al., 2015), *Tg[Cldnb:lynEGFP]* (Haas and Gilmour, 2006), *Tg[hs70:CA-FGFR1]* (Lee et al., 2009), *gSAG181A* and *SAGFF(LF)19A* (Kawakami et al., 2004). Heat-shock treatments were performed by immersing embryos in the E3 medium in 2-ml tubes in a water bath at 39°C for 20 minutes.

#### **Translation-blocking antisense morpholinos**

cRNAs were synthesized using mMessage mMachine (Ambion) according to manufacturer's instructions. Morpholinos that were used in this study were: MO1Eya1 (5'-AAACAAAGATGATAGACCTACTTCC-3' (Kozlowski et al., 2005).

#### **Somatic CRISPR gene knock-out**

Crispr somatic mutagenesis of Eya1 was done with 4 sgRNAs (Wu et al., 2018). A 1 mg/ml equimolar mixture of 4 sgRNAs, transcribed with MEGAshortscript T7 (Thermo Fischer), 5 mM Cas9 protein (Sigma), and 300 mM KCl, was injected into one-cell stage embryos. The sequences in the *eya1* gene targeted by each sgRNA are the following: CTTCCACTTACTCGGCTGTG, TTGTCAATGTTGGGACCGTT, GACGTACCTTCAGTGCCATT, AGAGCCGTCTGCTACAGAGG

#### **BrdU treatment**

10 mM 5-Bromo-2'-deoxyuridine (BrdU, B5002, Sigma) stock solution in DMSO was diluted to 10 µM in E3 medium and used to soak embryos. BrdU was incorporated into newly synthesized DNA in the S-phase; therefore, it functioned as a marker for cell proliferation. Embryos at 24 hpf were dechorionated and allowed to develop in this solution until desired stages. Embryos were fixed in 4% Paraformaldehyde (PFA) overnight at 4°C and then used for immunohistochemistry.

#### **TUNEL assay**

Apoptosis in the migrating primordium was identified using terminal transferase-mediated dUTP nick end-labeling (TUNEL) assay according to manufacturer's instruction with minor modifications (In situ Cell Death Detection Kit, TMR Red, Roche). Embryos at 30-42 hpf were dechorionated and fixed in 4% PFA overnight at 4°C, then stored in 100% methanol at -20°C for at least 1 day. They were rehydrated, permeabilized in 10 µg/ml Proteinase K in 0.1% PBSTw and post-fixed in 4% PFA then washed several times in 0.1% PBSTw. Embryos were then incubated in fresh TUNEL buffer for 1 h followed by incubation in the TUNEL reaction mix for 3 hrs at 37°C in dark. As negative control, embryos were incubated in TUNEL buffer only. Positive control embryos were incubated in polymerase chain reaction

buffer containing 3 U/ml DNase I recombinant (Roche) for 1 h at 37°C before adding the TUNEL reaction mix. After the reaction, samples were washed several times in 0.1% PBSTw at room temperature and stored in 0.1% PBSTw containing Vectashield mounting medium with DAPI (VectorLabs).

#### **Whole-mount immunohistochemistry**

Staged embryos were dechorionated and fixed in 4% PFA overnight at 4°C and washed several times with 0.1% Tween-20-containing Phosphate Buffer Saline (0.1% PBSTw). Larvae were blocked in 10% Bovine Serum Albumin (BSA) for at least 2 hours. Incubation with primary antibody was done overnight at 4°C. Primary antibodies and monoclonal antibodies were used at the following dilutions: mouse monoclonal antibody anti-BrdU, 1:100 (Upstate), rabbit anti-N-cadherin, 1/500. Texas red-labeled donkey anti-mouse and -rabbit and Cy5-labeled donkey anti-mouse and -rabbit immunoglobulin secondary antibodies (Jackson ImmunoResearch) were used at 1/150. For BrdU labeling detection, before blocking and applying primary antibody anti-mouse, additional steps were needed to permeabilize the nuclear membrane and to denature DNA strands. Larvae were incubated with 10 µg/ml Proteinase K in 0.1% PBSTw for 20 min at room temperature. Immediately afterwards, larvae were post-fixed in 4% PFA for 15 min and washed several times in 0.1% PBSTw. To denature DNA, samples were incubated in fresh 2 N HCl for 1 h and washed several times in 0.1% PBSTw. Samples were blocked in BrdU blocking solution for at least 2 hrs at RT and then incubated in BrdU blocking solution containing the antibodies at 4°C.

#### **Whole-mount *in situ* hybridization**

For ISH, antisense digoxigenin- and fluorescein-labeled riboprobes were synthesized according to manufacturer's instructions (Roche) by using T7/SP6/T3 RNA polymerases. Probes used were: *Sdf1a*, *Cxcr7b*, *Cxcr4b*, *Pea3*. Whole-mount two-color fluorescence ISH was performed using anti-DIG and -fluorescein POD antibodies (Roche) and Tyramide Signal Amplification (TSA, PerkinElmer) to detect the riboprobes. Larvae were mounted in 0.1% PBSTw with Vectashield/DAPI (1/100, Vector Labs.) For HCR whole-mount fluorescent *in situ* hybridization, a set of 20 probe pairs was used (Molecular Instruments, Inc.) following a protocol described by the manufacturer. Briefly, samples were fixed in 4% paraformaldehyde (PFA) for 24h at 4°C, permeabilized with methanol and cooled to 20°C. Next day, samples were rehydrated, treatment with proteinase K and post-fixed in PFA for 20 min at room temperature. The samples were washed with PBST between the steps. Probe hybridization buffer was used for the prehybridization for 30 min at 37°C and the samples were incubated in the probe solution, prepared following the manufacturer's instructions, overnight at 37°C. After removing the probe solution, washing the samples and incubating them in the pre-amplification buffer, the samples were incubated in the hairpin mixture overnight in the dark at

room temperature. Finally, after several washes with SSCT, the cell nuclei were stained with DAPI (4,6-diamidino-2-phenylindole, Sigma) 1 hour at room temperature.

### **Imaging and time-lapse video microscopy**

For whole-mount ISH, embryos were deyolked, flat mounted and photographed with a Olympus BX61 microscope using 20X or 40X dry objectives with transmission light. Whole embryo images were acquired on a Leica MZ10 stereomicroscope. Fluorescent images were acquired using either a Leica SP5 or SPE microscope using 20X dry objective or 40X oil immersion objective. Images were processed using Imaris and/or ImageJ software packages, and assembled with Adobe Photoshop CS2, Adobe Illustrator CS2, and Macromedia FreeHand MX. For time-lapse imaging, staged and dechorionated embryos were anesthetized with tricaine and mounted in 0.8-1% low-melting-point agarose on a glass-bottom culture dish (MatTek) as previously described (Pinto-Teixeira, F. et al., 2015). Z-stack series were acquired every 4-10 min using a 20X dry objective of Leica SPE or SP5 confocal microscope. All movies were processed with the Imaris or ImageJ software packages. An unpaired two-tailed T test with Welch's correction was used to compare the position of neuromast L4 in *Eya1* mutants and wild-type siblings. Statistics were performed using the GraphPad Prism software and Excel running QI Macros.

### **FIGURE LEGENDS**

**Figure 1. Mitotic activity and apoptosis in the *Eya1*<sup>-/-</sup> primordia.** (A) Wild type and (B) *Eya1* mutants Gateways57 larvae at 72hpf. Arrows point to the position of the neuromast in the posterior lateral line. Because of the transparency of live larvae, out of focus neuromasts can be seen from the opposite side of the fish. (C,D) Plot of the distance (in  $\mu\text{m}$ ) between the caudal limit of the otic vesicle and the average number of deposited neuromasts in *Eya1* mutants and wild-type siblings at 3 dpf (mean $\pm$ s.d.). N= 4 wild-type fish and N=9 *Eya1* fish. (E-F) Cell proliferation analysis of wild-type and *Eya1* primordial. BrdU incorporation (red) on Tg[CldB:lynEGFP] embryos (green) shows no obvious differences in S-phase completion between wild type (E) and *Eya1* mutant embryos (F). (G,H) Cell viability analysis by the TUNEL assay (red) on Tg[CldB:lynEGFP] embryos (green) counterstained with the nuclear dye DAPI (blue) of wild type (G) and *Eya1* primordia (H) and

injected with a p53 morpholino (I,J). Quantification of the number of neuromasts at 72hpf in wild type (blue bars) and *eya1/dog* (green bars) (K). The average number of neuromasts were counted in non-injected and MOP53- injected Tg[CldnB:lynEGFP] controls (blue bars) and *Eya1*<sup>-/-</sup>;Tg[CldnB:lynEGFP] (green bars). The total number of neuromasts did not differ between non-injected and MOP53-injected wild type embryos. The data is represented as mean  $\pm$  standard deviation (s.d.). (N=23, P<0,001, Unpaired two-tailed T test with Welch's correction). (L) The average distance of neuromast L<sub>4</sub> to the otic vesicle (used as morphological landmark) was used as a proxy to the extent of migration in non-injected and MOP53-injected Tg[CldnB:lynEGFP] controls (blue bars) and *Eya1*<sup>-/-</sup>;Tg[CldnB:lynEGFP] (green bars).

**Figure 2. Transgenic lines for the characterization of primordium migration speed and neuromast deposition. (A-B)** A triple transgenic 32 hpf 181A;19:RFP larvae. The gSAG181A line specifically expresses EGFP in the posterior primordium. (B) The 19A line expresses a Gal4 protein in rear primordial cells, pro-neuromasts and inter-neuromast cells. (C) Whole-mount *in situ* hybridization of *sash1a*. (D) Still frames of a time-lapse movie focusing on the migrating primordium. 19A:RFP marks the cells that form rosettes and eventually the proto-neuromast (PN). A few cells expressing 19A remain in the trailing edge even after proto-neuromast deposition. (E) Kymograph of the above movie representing the kinetics of the migration process. The leading edge advances linearly with a velocity of roughly 80 microns per hour at 28°C. The trailing 19A:RFP signal is associated with neuromast deposition.

**Figure 3. Primordium migration defects and splitting in *eya1/dog* mutants. (A)** A transgenic gSAG181A larva at 30hpf. This line specifically expresses EGFP in the posterior lateral line primordium. (B) A primordium and a recently deposited neuromast on SAGFF(LF)19A;UAS:RFP larva. SAGFF(LF)19A expresses a Gal4 protein in rear primordial cells, pro-neuromasts and inter-neuromast cells. (C) Still frames of a time-lapse movie focusing on the migrating primordium. RFP driven by SAGFF(LF)19A marks the cells that form rosettes and eventually the proto-neuromast. A few cells expressing 19A remain in the trailing edge after proto-neuromast deposition. (D) Still frames from a representative *Eya1* crispant larva in the 181A;19A:RFP transgenic background. No neuromast deposition is seen for the duration of the movie. The fish was confirmed to express 19A:RFP in the otic neuromasts but barely any red fluorescence is seen in the trailing edge. (E) Kymograph of the above wild-type movie representing the kinetics of the migration process. The leading edge advances linearly with a velocity of roughly 80 microns per hour at 28°C. The trailing 19A:RFP signal is associated with rosetogenesis. (F) Kymograph of the migration process in (D) The



curved shape of the trajectory indicates that after stalling, the primordium performs a u-turn and resumes migrating towards the anterior. A few black gaps in the solid green band reflect splitting of the primordium. (G) Stillframes of the leading edge in a *Eya1* knockout primordium. From 20 to 50 min, a handful of cells split from the rest of the primordium but subsequently fuse to it again.

**Figure 4. *Eya1* is necessary for *Cxcr7b* expression.** (A,B) Fluorescent whole-mount *in situ* hybridization of *Sdf1a* (red), counterstained with DAPI (blue) to reveal the nuclei for better identification of the primordium (white dotted outline). It shows that the *Sdf1a* gene (red) is expressed along the horizontal myoseptum in the wild type (A) and *Eya1* mutants (B). (C-D'') *CXCR4b* (green) and *CXCR7b* (red) gene-expression profiles in wild type (C) and *Eya1* mutants (D) The *CXCR4b* gene is strongly expressed in the leading region of primordium in both in wild-type and *Eya1* mutants (C',D'). The expression of *CXCR7b*, however, is strong in the trailing region of the wild-type primordium (overlapping with *CXCR4b*), but almost completely lost in *Eya1* mutants, as it is restricted to the very end of the trailing region and never overlaps with *CXCR4b* (C'',D'').

**Figure 5. Loss of *Eya1* function de-regulates FGF expression in the primordium.**

(A-H) Notch pathway in wt and *Eya1* (-) primordia. *In situ* hybridization against *Notch3* (C,D) and *DeltaA* (E,F). (I-L'') HCR-FISH in whole-mount larvae for FGF pathway markers *pea3* (*etv4*), *fgf3* and *fgfr1a*. In wild-type primordia, *pea3* expression is strongest in the trailing end (I). When *eya1* is somatically mutated by *crispant*, *pea3* is almost completely lost (J). *Fgf3* ligand is produced normally in the leading tip of the primordium from which it diffuses posteriorly and binds to the *Fgfr1a* receptor expressed in trailing cells (K-K''). *eya1* *crispants* show a slight expansion of *fgf3* distribution while the *Fgfr1a* trailing domain recedes mildly (L-L''). (M-P) WM-ISH to *CXCR7b* in the posterior lateral-line primordium in wild type controls (M), *Eya1* morphants (N), Tg[*hsp70:ca-Fgfr1*] transgenics (O) and Tg[*hsp70:ca-Fgfr1*] transgenics + *Eya1* morphants (P). Overactivation of FGF signaling does not expand the expression domain of *CXCR7b* (O), and does not rescue the down-regulation of *CXCR7b* expression upon loss of *Eya1* (P). (Q-T) Antibody staining of N-cadherin (red) to reveal adherens junction and the apical constriction of rosettes in CldB:lynEGFP embryos (green). Apical constriction of the rosettes are evident in the wild type sample (S), but they are disrupted in *Eya1* mutants (T).

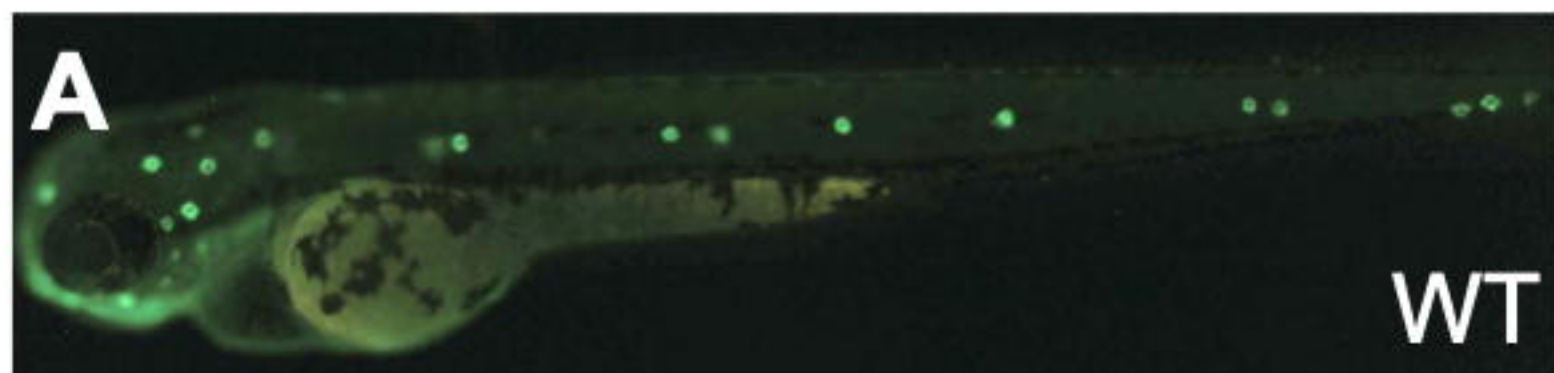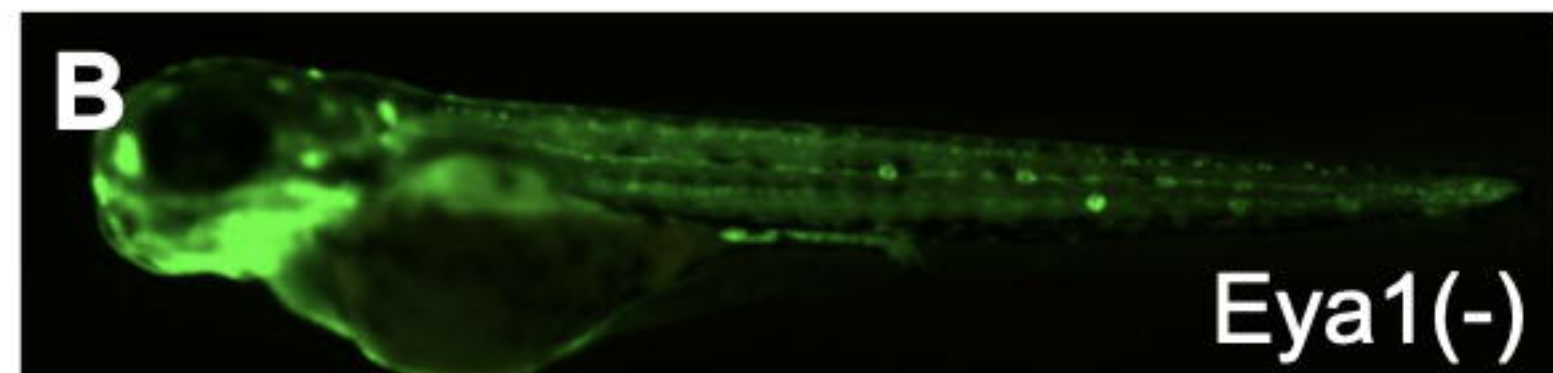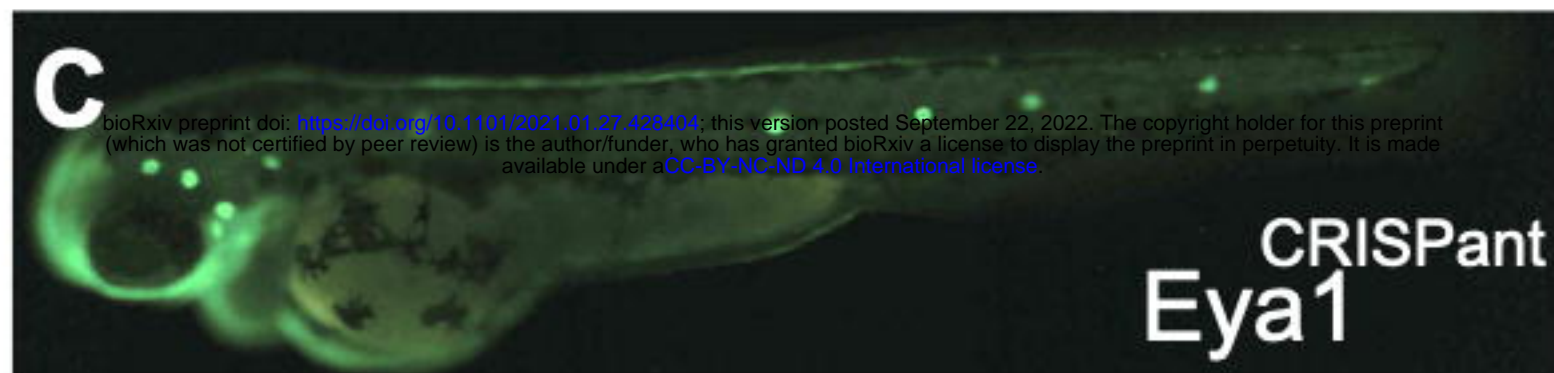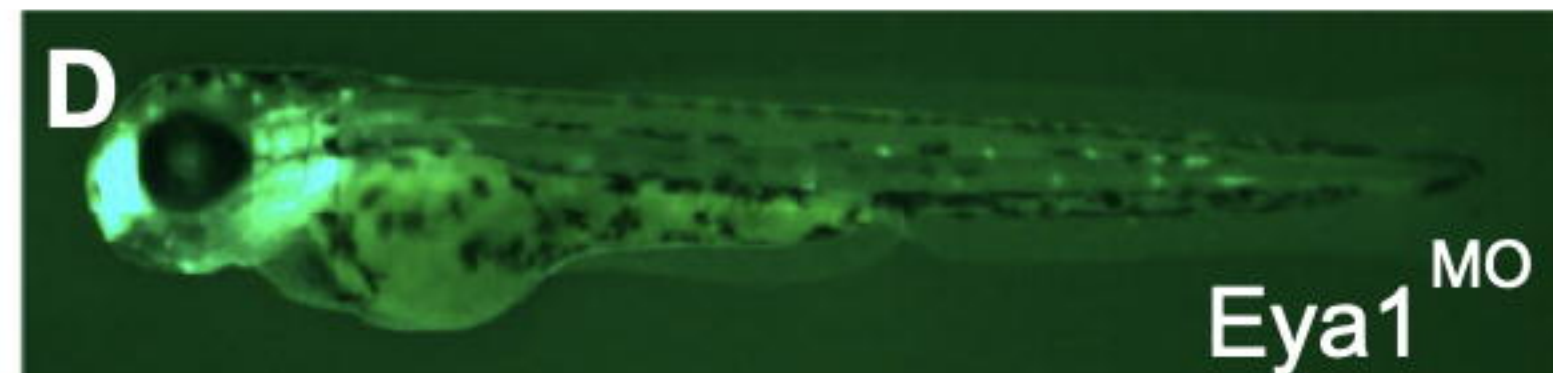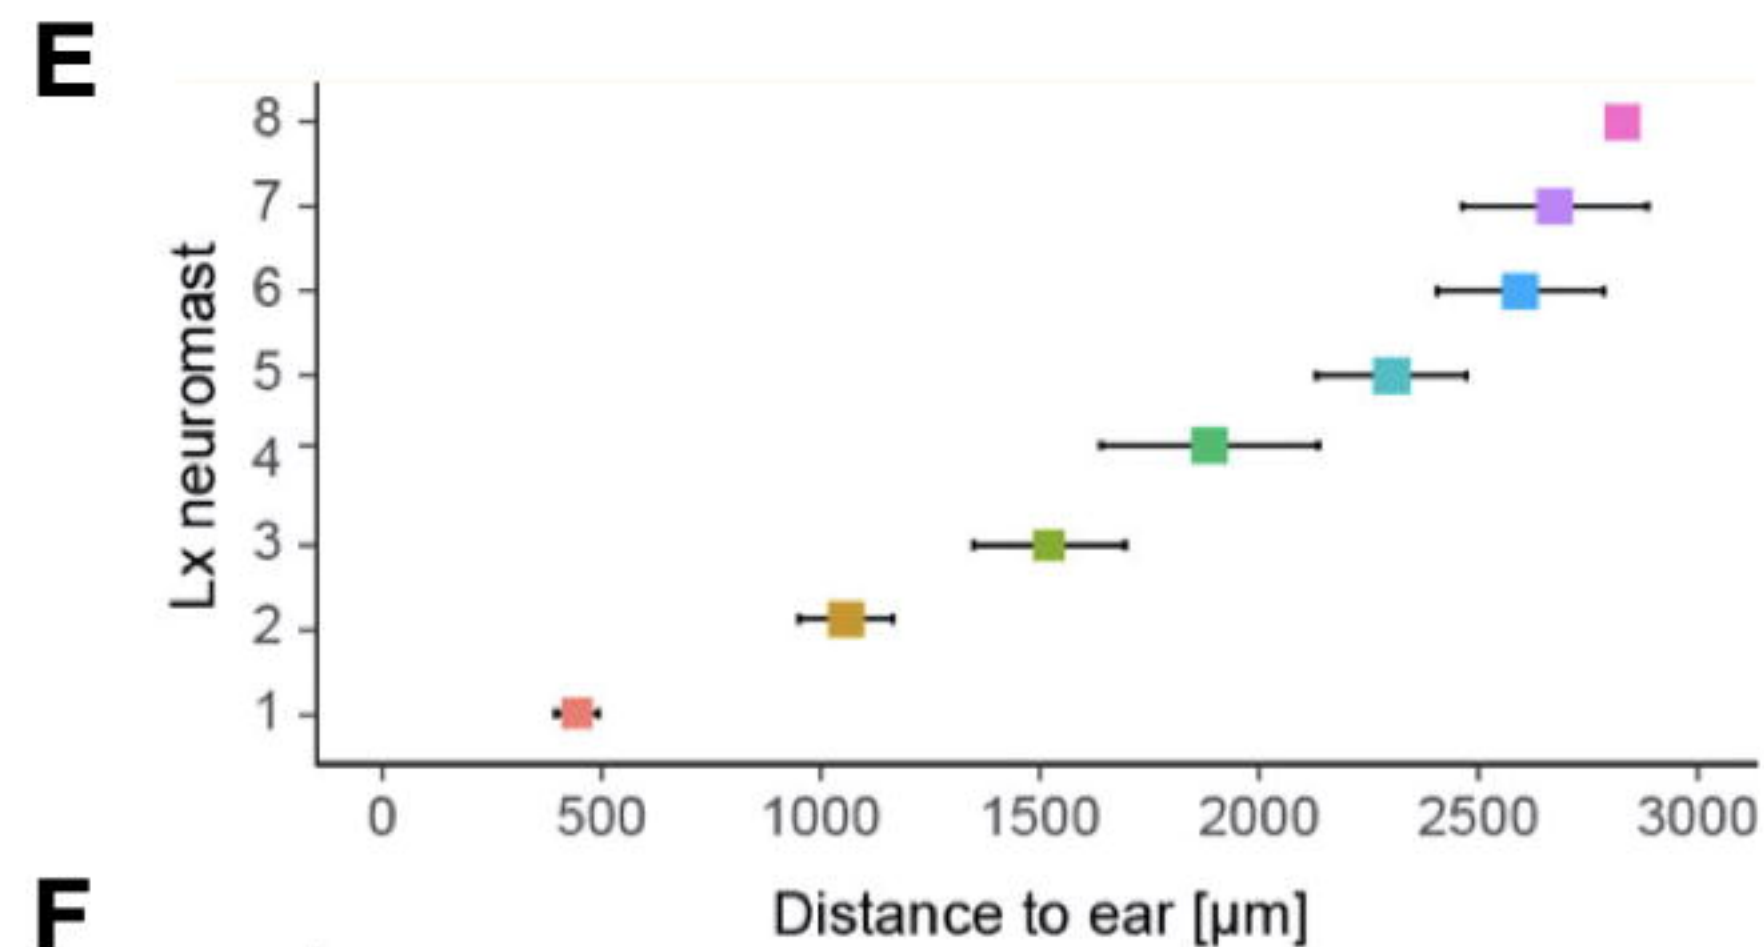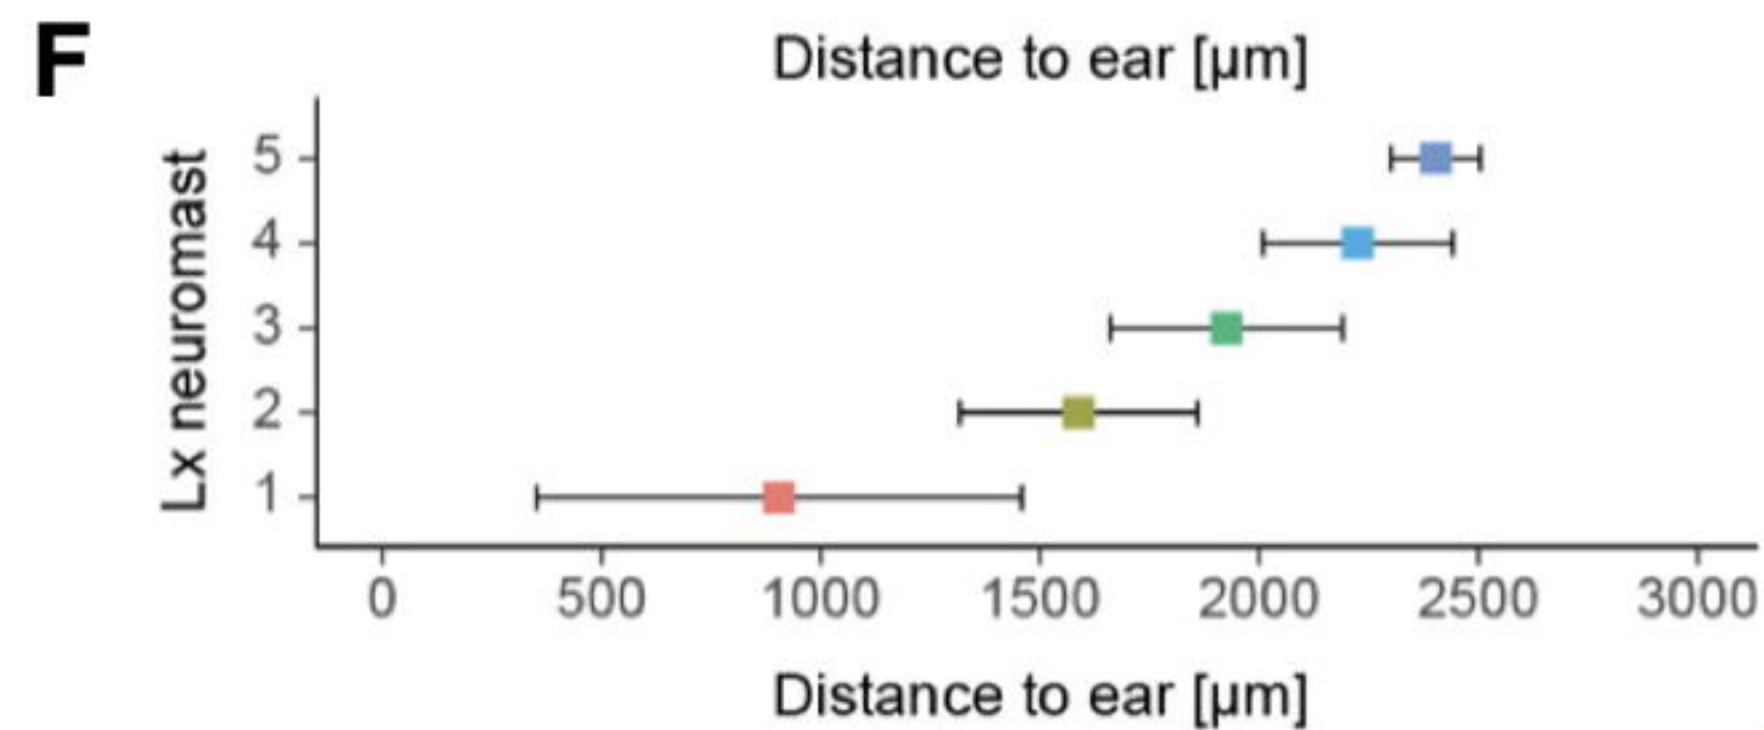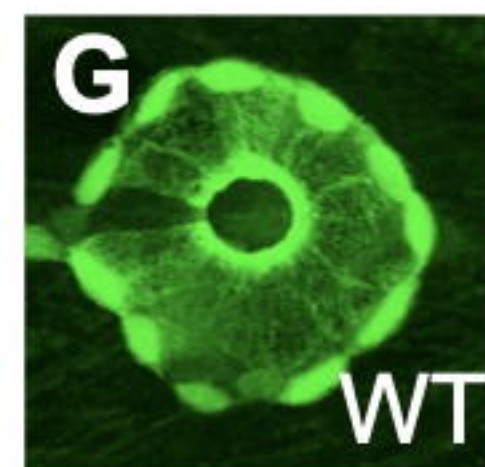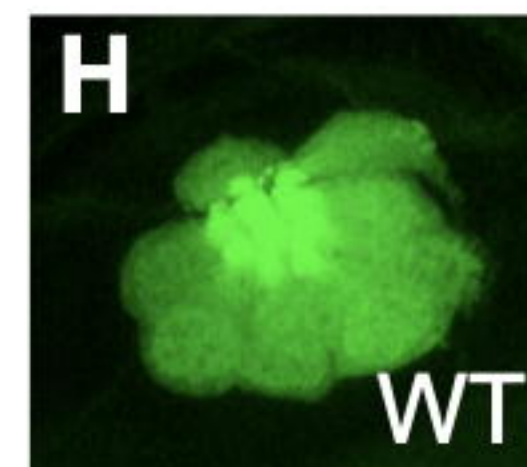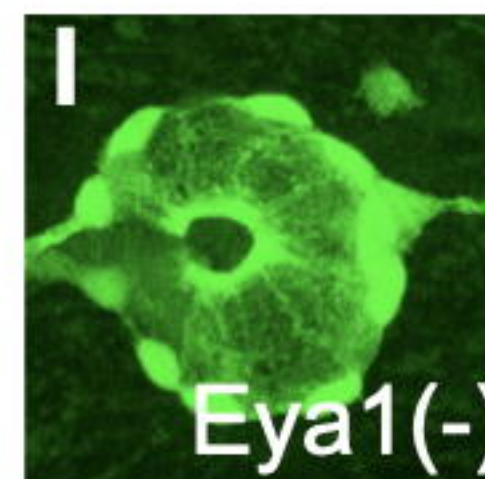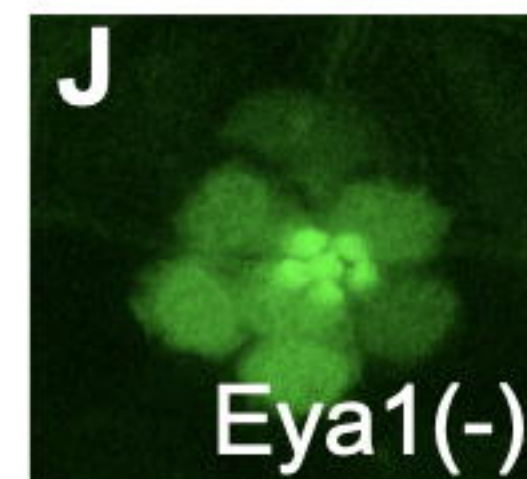

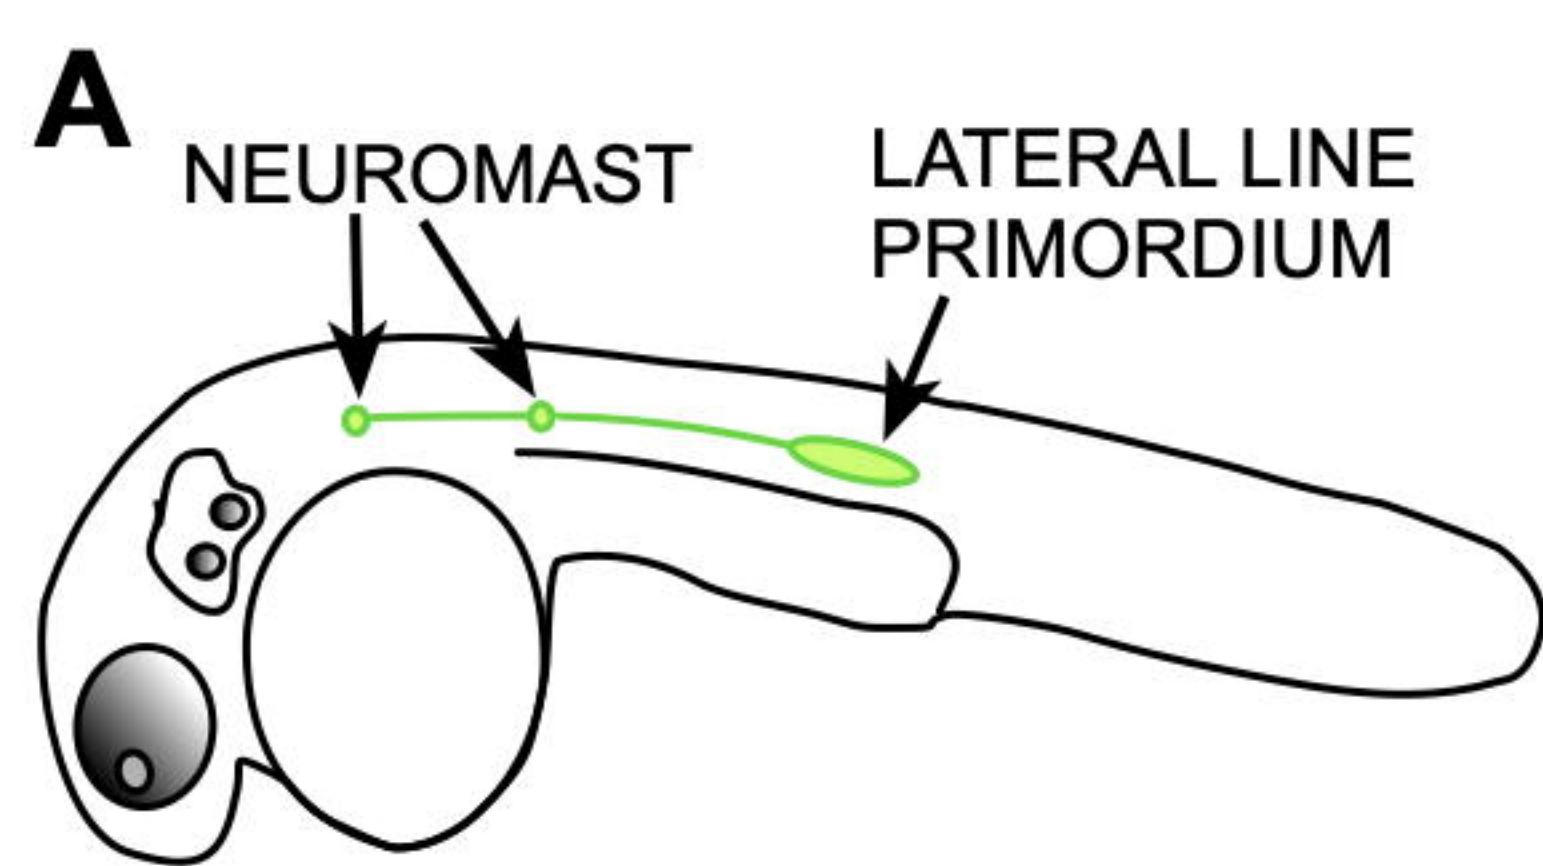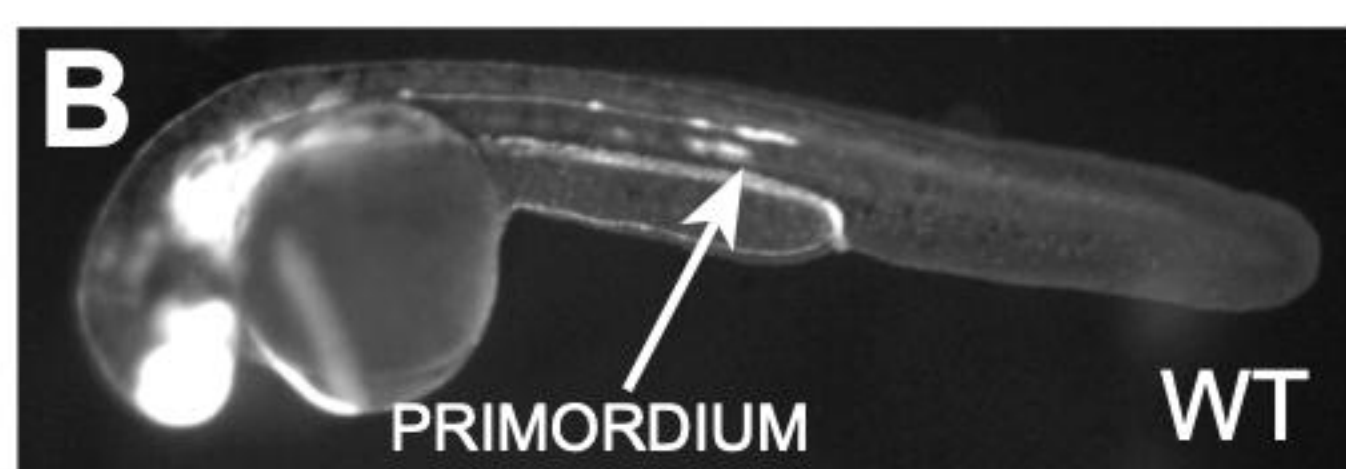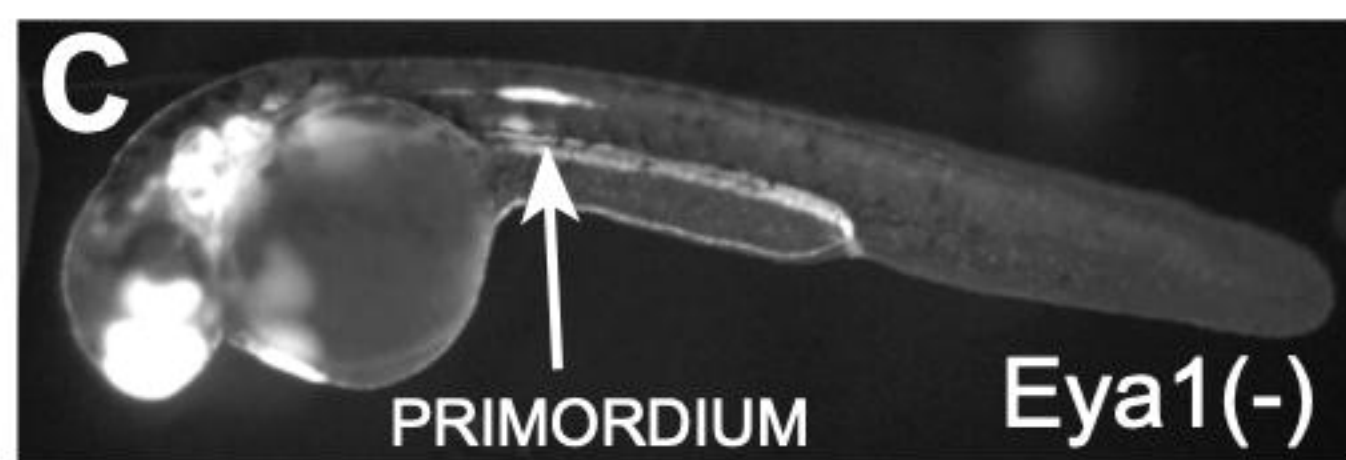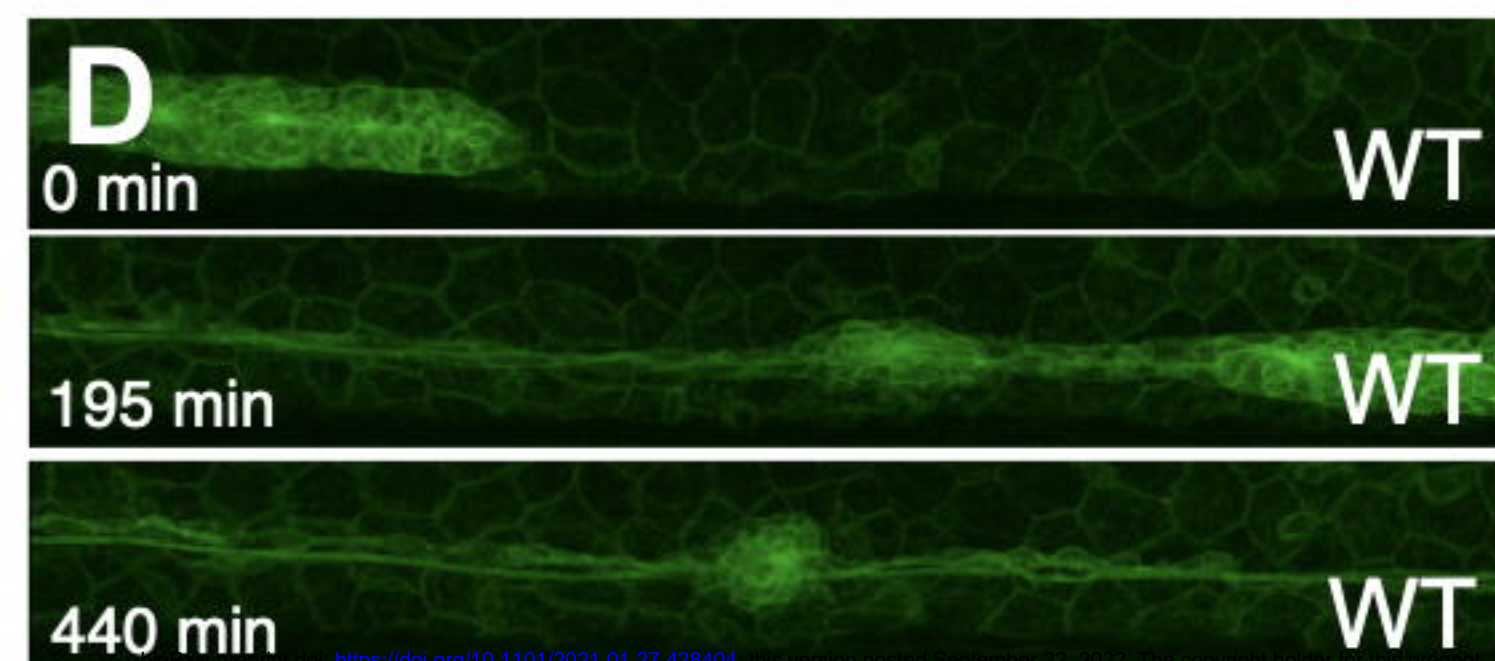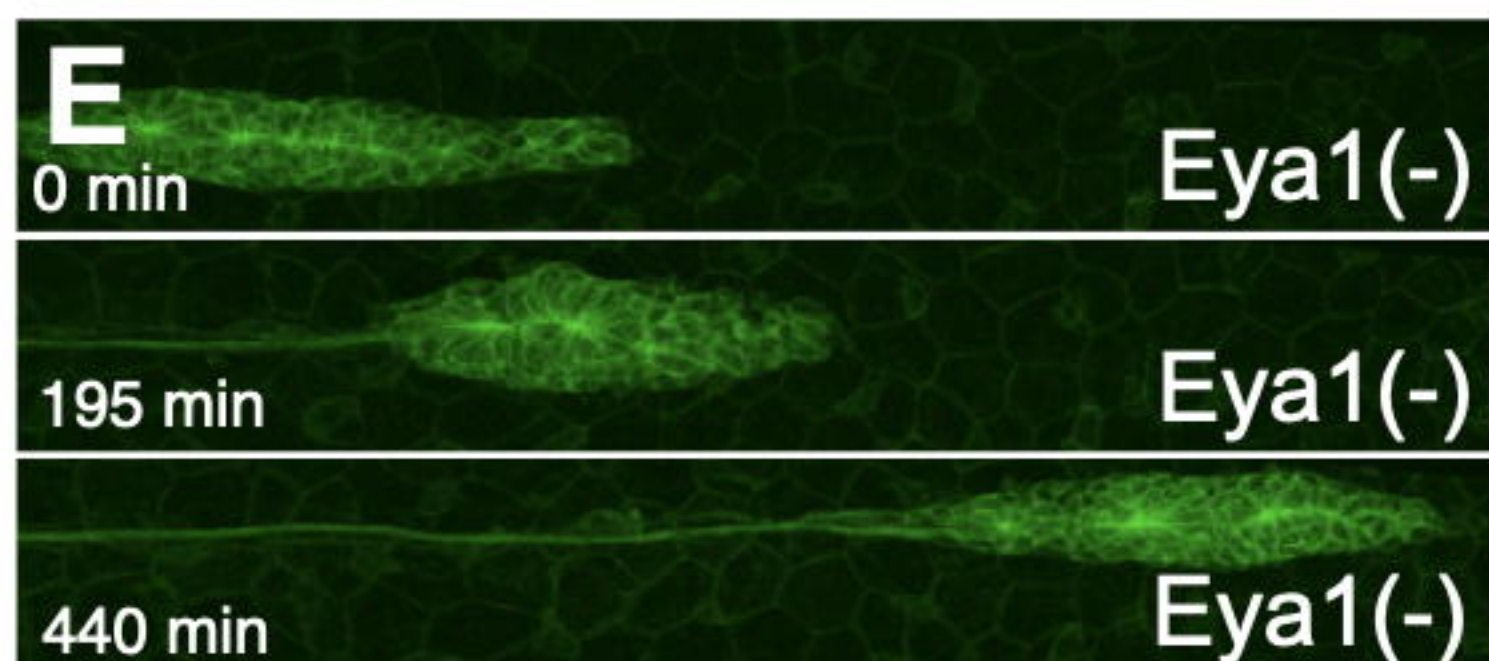

<https://doi.org/10.1101/2021.01.27.428404>  
 (which was not certified by peer review) is the author/funder, who has granted bioRxiv a license to display the preprint in perpetuity. It is made available under aCC-BY-NC-ND 4.0 International license.

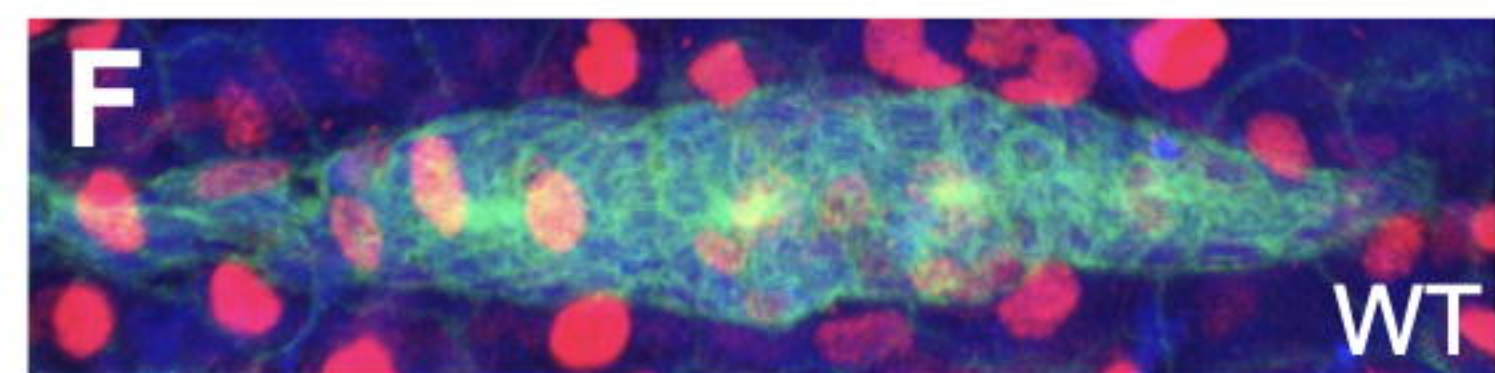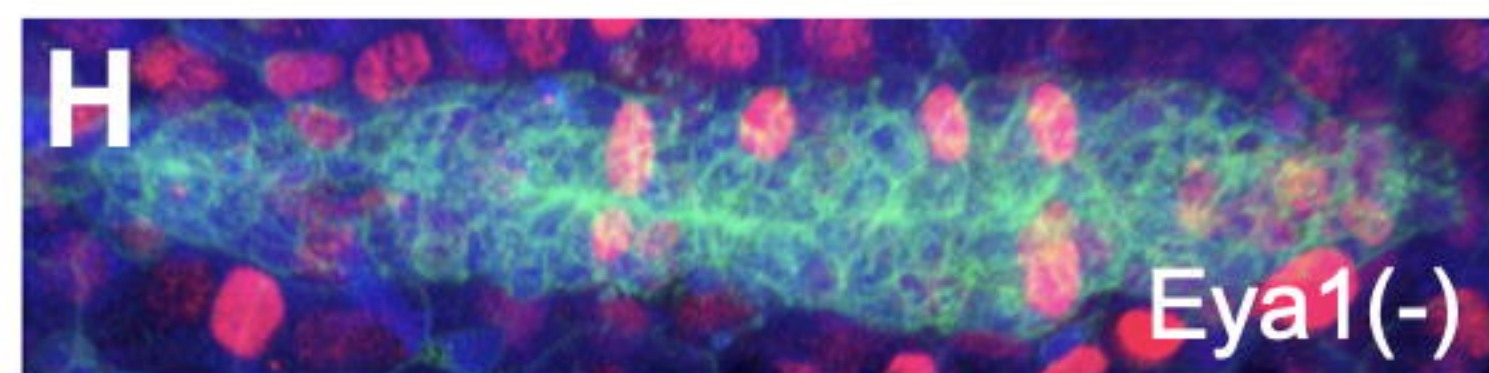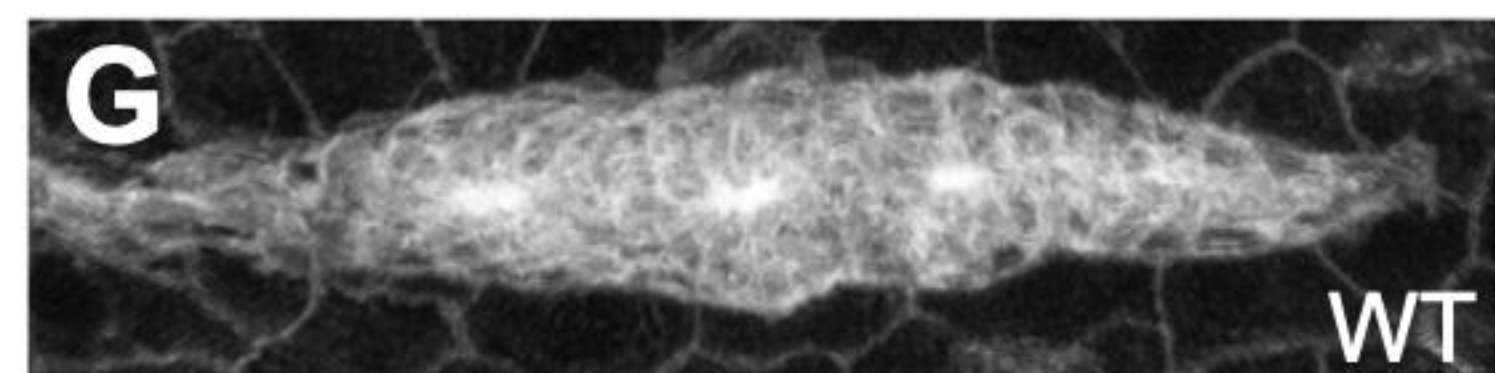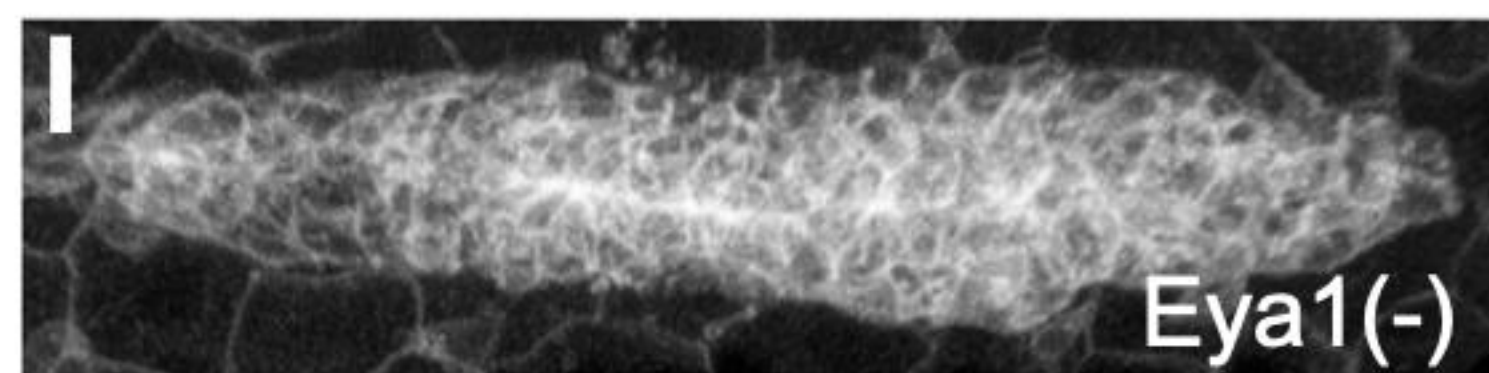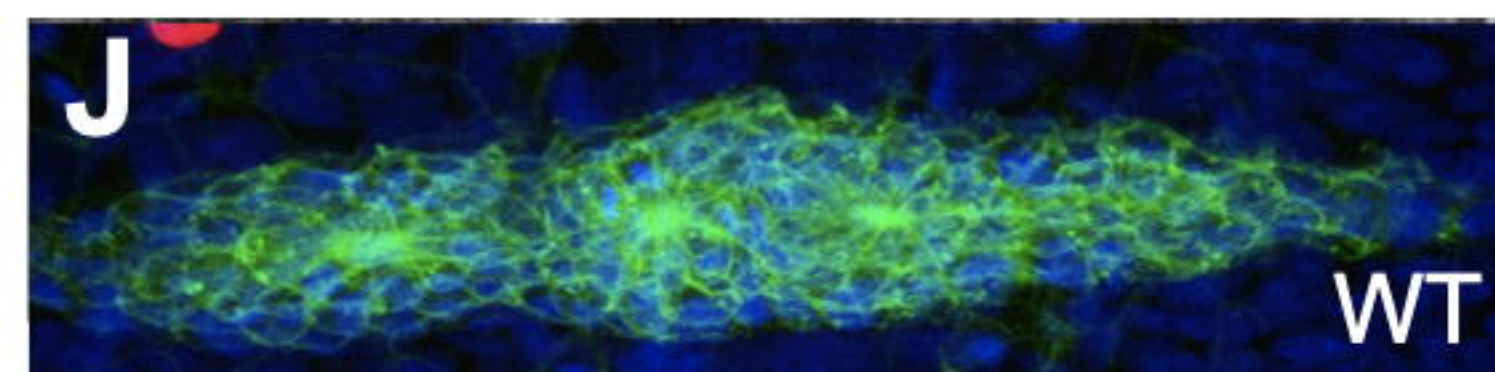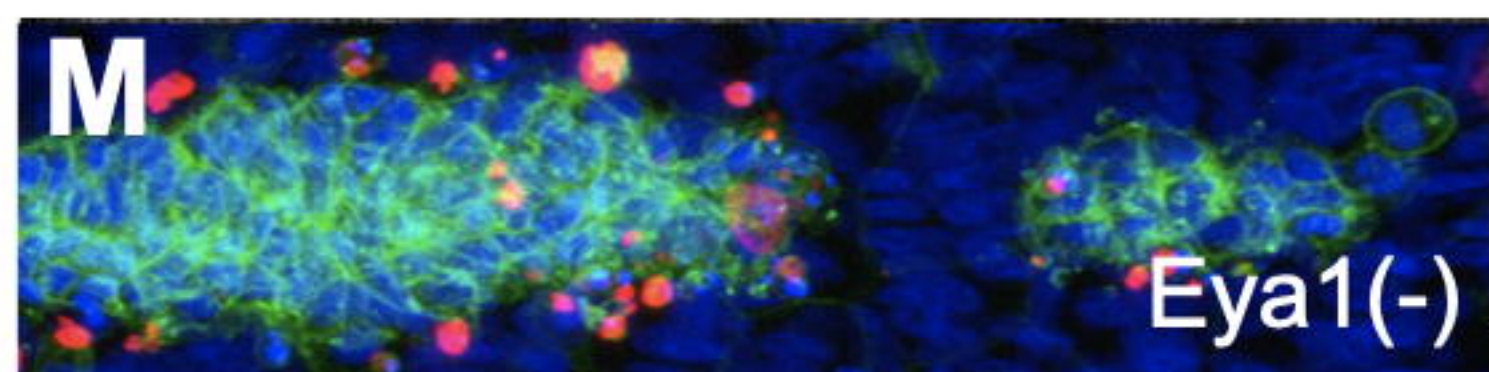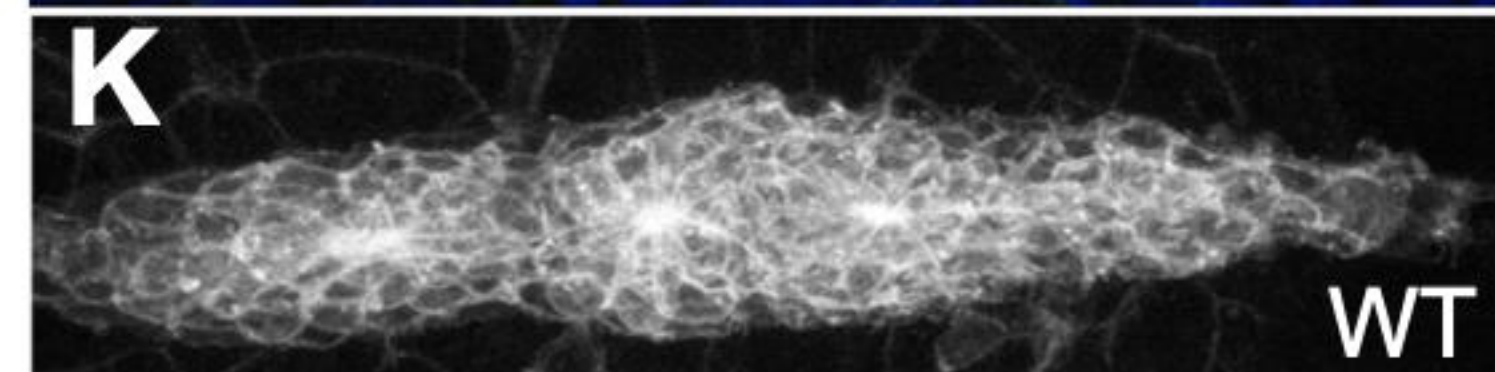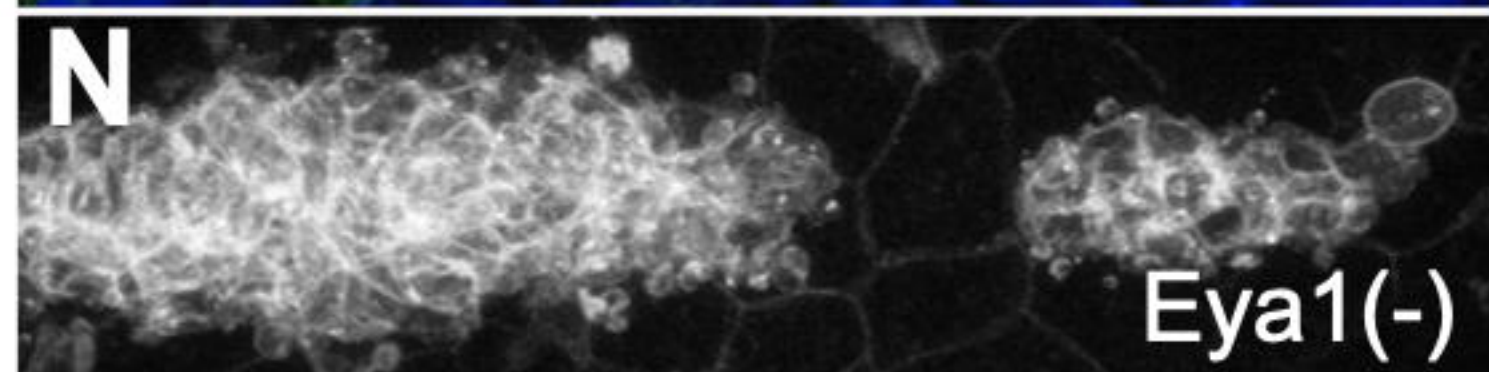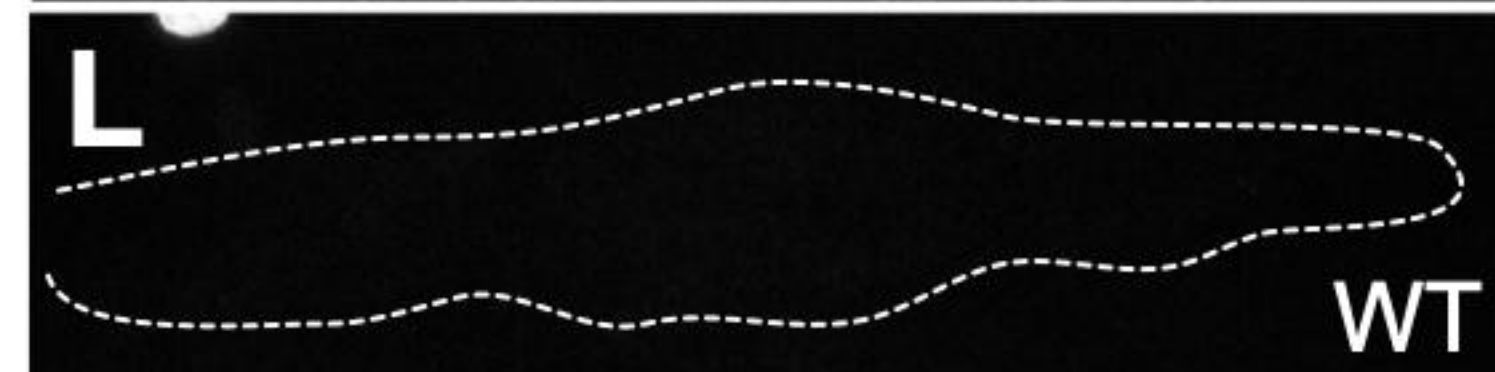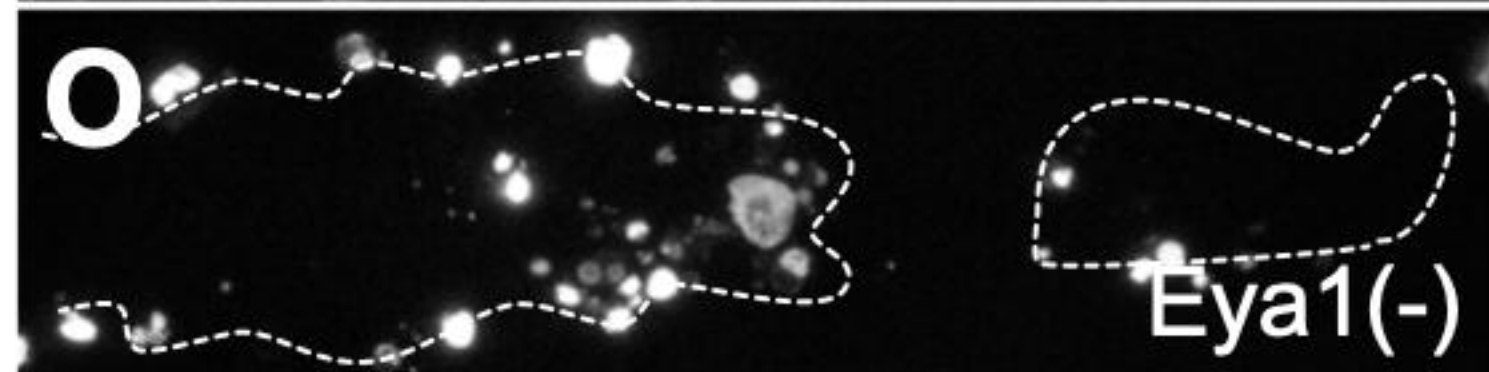

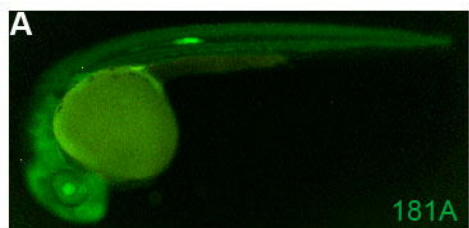

WT

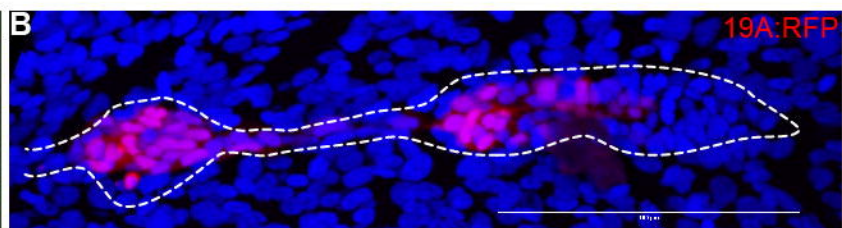

*eya1* crispant

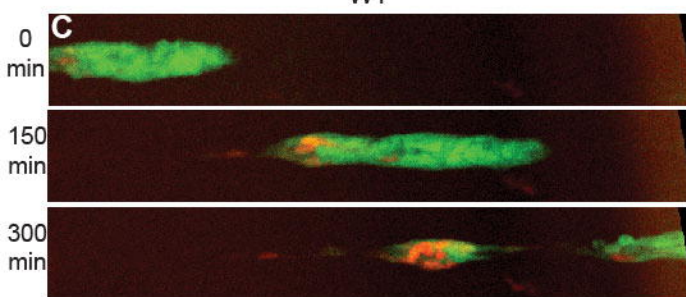

Kymograph

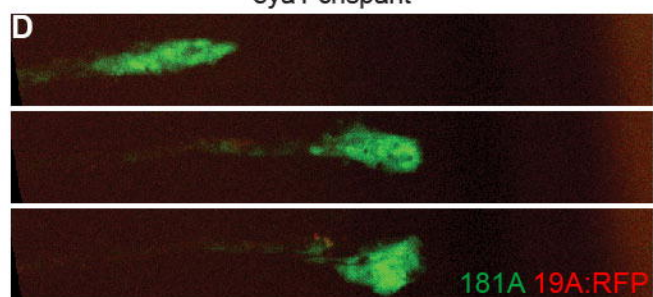

Kymograph

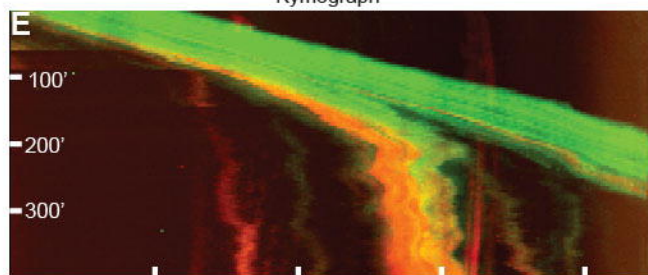

A-P axis [ $\mu\text{m}$ ]

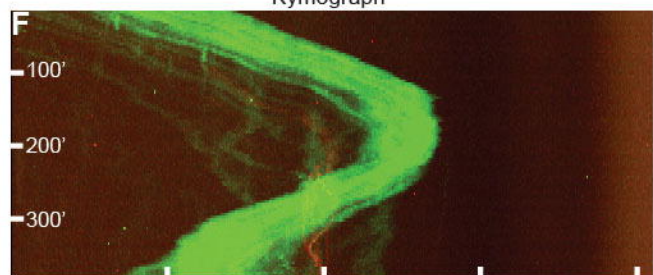

A-P axis [ $\mu\text{m}$ ]

*Eya1*(-)

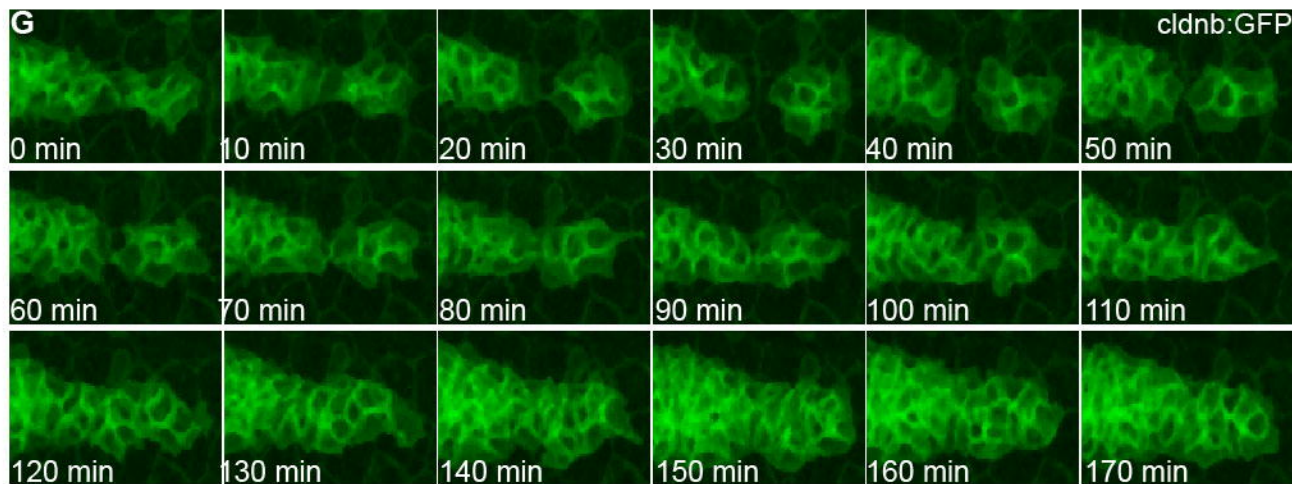

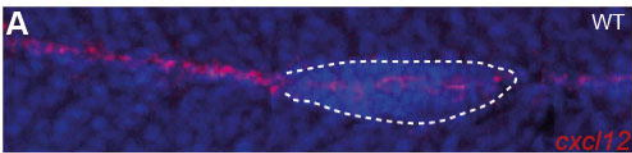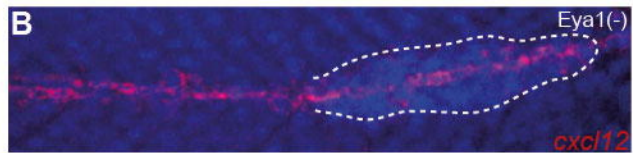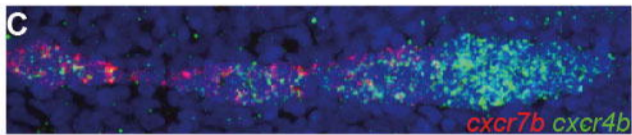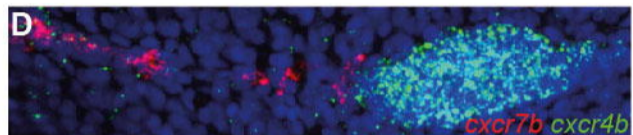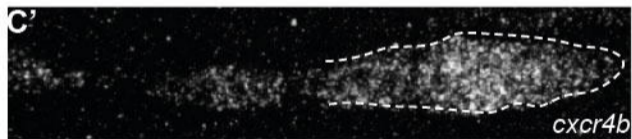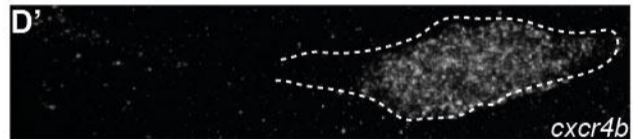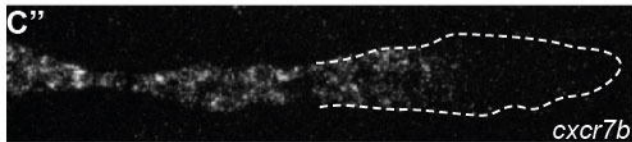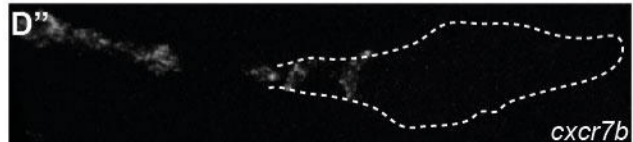

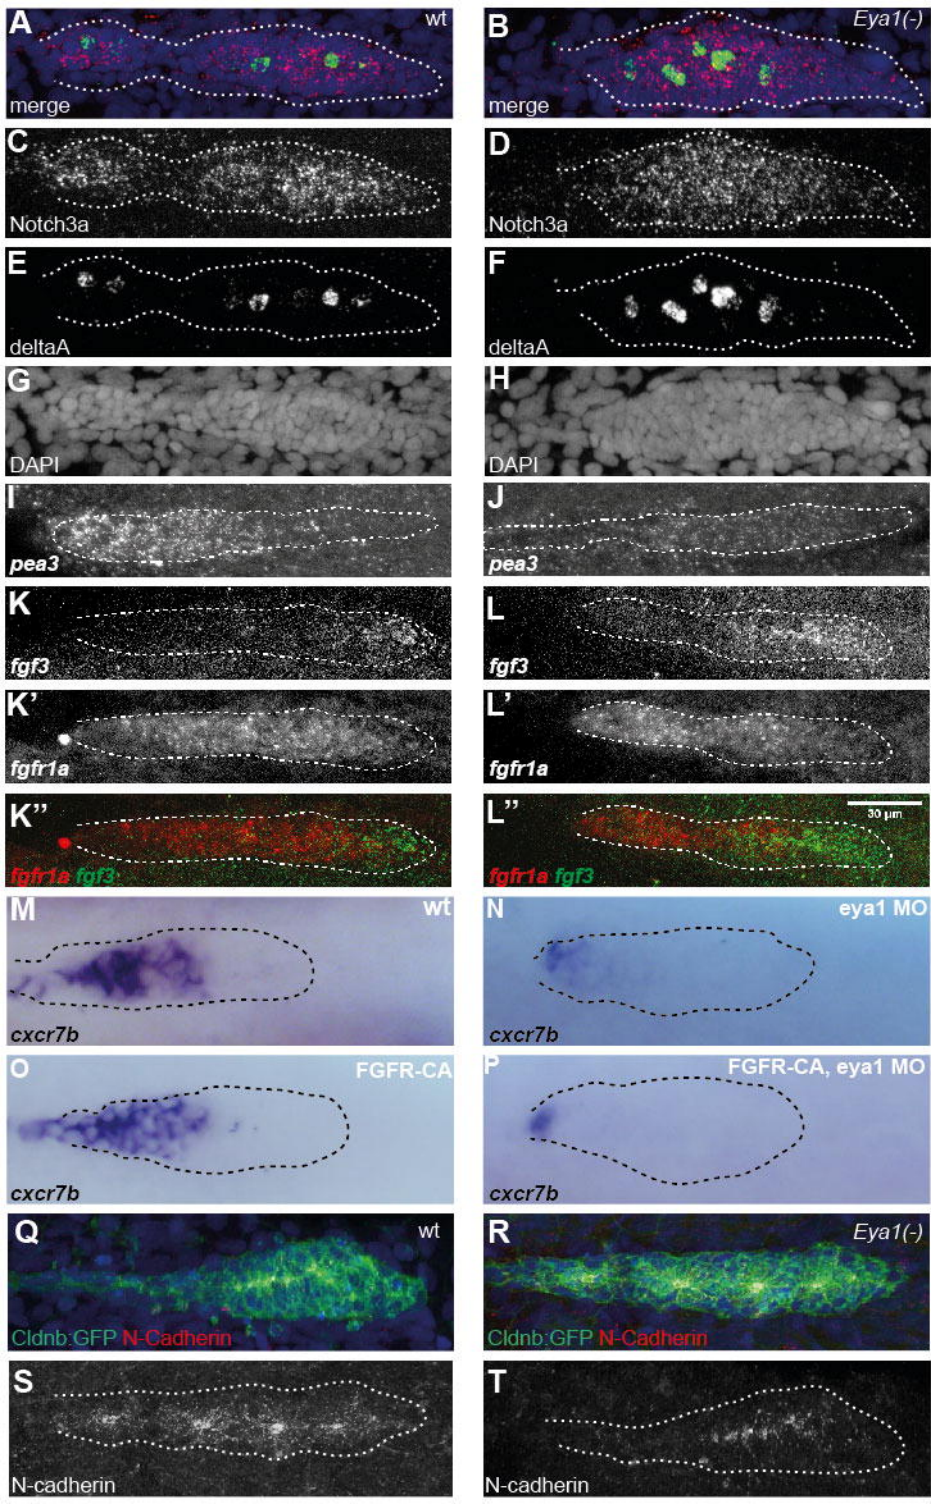

Source: https://www.biorxiv.org/content/10.1101/2021.01.27.428404v2.full.pdf
